# Supplementary material for: Copper-catalyzed reactions of α,β-unsaturatedN-tosylhydrazones with diaryliodonium salts to constructN-arylpyrazoles and diaryl sulfones
Source: Royal Society of Chemistry journal article supplement (doi:10.1039/d2ob01338j), 2022-01-01
Supplement: d2ob01338j1.pdf [file d2ob01338j1.pdf]

## Supporting Information

### Copper-catalyzed reactions of $\alpha,\beta$ -unsaturated *N*-tosylhydrazones with diaryliodonium salts to construct *N*-arylpiperazines and diaryl sulfones

Lian-Mei Chen,<sup>†</sup> Chuang Zhou,<sup>\*</sup> Jing Li,<sup>†</sup> Jun Li, Xiao-Qiang Guo,<sup>\*</sup> and Tai-Ran Kang<sup>\*</sup>

#### Table of Contents

|                                                                            |     |
|----------------------------------------------------------------------------|-----|
| 1. General experiment information .....                                    | S2  |
| 2. Optimization of reaction and control experiments .....                  | S2  |
| 3. Synthesis of $\alpha, \beta$ -unsaturated tosylhydrazone reagents.....  | S5  |
| 4. Synthesis of diphenyliodonium triflate reagents.....                    | S6  |
| 5. General procedure for the domino reaction and gram scale reaction ..... | S6  |
| 6. References .....                                                        | S7  |
| 7. <sup>1</sup> H NMR, <sup>13</sup> C NMR data of compounds .....         | S8  |
| 8. NMR Spectrogram information.....                                        | S15 |
| 9. X-Ray Structure of 3i.....                                              | S42 |
| 10. X-Ray Structure of 4b.....                                             | S43 |

## 1. General experiment information

All reactions were carried out in dried glassware with magnetic stirring. Solvents used in the reactions were distilled from appropriate drying agents prior to use.  $^1\text{H}$  NMR and  $^{13}\text{C}$  NMR spectra were recorded respectively at 400MHz and 100MHz (600MHz and 150MHz). Chemical shifts are reported in parts per million (ppm) down field from TMS with the solvent resonance as the internal standard. Coupling constants (J) are reported in Hz and refer to apparent peak multiplications. High resolution mass spectra were obtained on Bruker Daltonics micrOTOF-Q II spectrometer in ESI mode. Melting points were recorded using Reichert melting point apparatus and temperatures were uncorrected. All the reagents were obtained from commercial supplier and used as received, without further purification unless otherwise noted.

## 2. Optimization of reaction and control experiments

Table 1. Optimization of reaction conditions. <sup>[a]</sup>

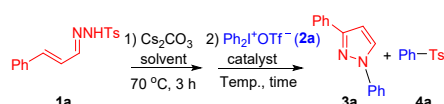

| entry             | catalyst                              | solvent            | Temp. (°C)/<br>time (h) | 3a | 4a |
|-------------------|---------------------------------------|--------------------|-------------------------|----|----|
| 1                 | -                                     | DCE                | 70/1                    | <  | 9  |
| 2                 | Cu(OTf) <sub>2</sub>                  | DCE                | 70/1                    | 2  | 9  |
| 3                 | CuI                                   | DCE                | 70/1                    | 3  | 9  |
| 4                 | Cu(BF <sub>4</sub> )(CN) <sub>4</sub> | DCE                | 70/1                    | 1  | 9  |
| 5                 | Cu(OAc) <sub>2</sub>                  | DCE                | 70/1                    | 4  | 9  |
| 6                 | Cu(OAc) <sub>2</sub>                  | Dioxane            | 70/1                    | 4  | 9  |
| 7                 | Cu(OAc) <sub>2</sub>                  | CH <sub>3</sub> CN | 70/1                    | 3  | 9  |
| 8 <sup>c,d</sup>  | Cu(OAc) <sub>2</sub>                  | DMF                | 70/1                    | 7  | 9  |
| 9 <sup>c,d</sup>  | Cu(OAc) <sub>2</sub>                  | DMSO               | 70/1                    | 6  | 9  |
| 10 <sup>c,d</sup> | Cu(OAc) <sub>2</sub>                  | DMF                | 110/12                  | 8  | 9  |
| 11 <sup>c,d</sup> | Cu(OAc) <sub>2</sub>                  | DMF                | 130/24                  | 9  | 9  |

[a] Reaction conditions:  $\alpha$ ,  $\beta$ -unsaturated *N*-tosylhydrazone **1a** (0.1 mmol, 1.0 equiv), Cs<sub>2</sub>CO<sub>3</sub> (0.15 mmol, 1.5 equiv) in 1 mL of solvent at 70 °C for 3 hours. And then, diaryliodonium salt **2a** (0.1 mmol, 1.0 equiv) and copper catalyst (0.005 mmol, 5 mmol%) were added, reacting at 70 °C, 110 °C and 130 °C for 12 hours or 24 hours. [b] Isolated yield. [c] The regioselectivity of **3a/3a'** >20:1. [d] Determined by  $^1\text{H}$  NMR analysis of the crude reaction mixture.

the 1,5-diphenyl-pyrazole **3a'** was minor isomer.

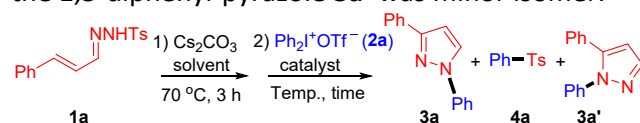

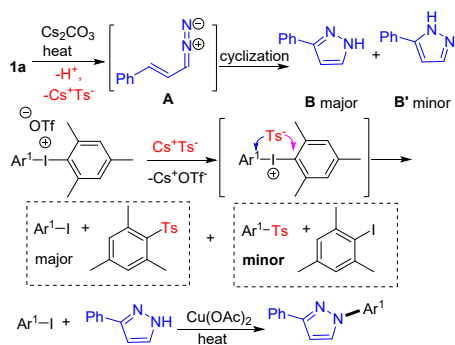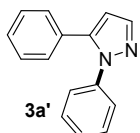

**1,5-diphenyl-pyrazole (3a')**  $R_f = 0.60$  (EA/PE = 1:10), oil,  $^1\text{H NMR}$  (400 MHz, Chloroform-*d*)  $\delta$  7.75 (d,  $J = 1.8$  Hz, 1H), 7.39 – 7.30 (m, 8H), 7.29 – 7.24 (m, 2H), 6.54 (d,  $J = 1.8$  Hz, 1H).  $^{13}\text{C NMR}$  (101 MHz,  $\text{CDCl}_3$ )  $\delta$  143.00, 140.28, 140.17, 130.65, 128.85, 128.76, 128.43, 128.16, 127.38, 125.21, 107.82. HRMS calcd for  $\text{C}_{15}\text{H}_{12}\text{N}_2$   $[\text{M}+\text{H}]^+$ : 221.1079, found: 221.1083.

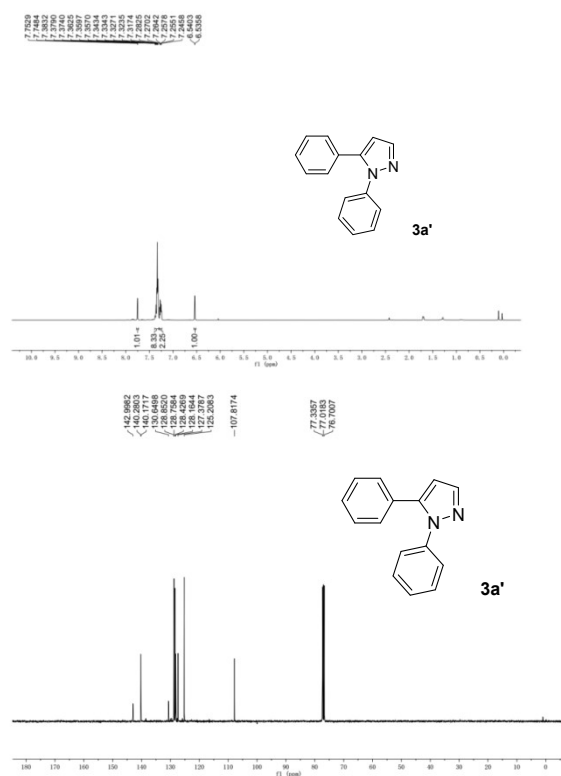

**Scheme 2. Substrate Scope of unsymmetrical diaryliodonium salts (for detail)**

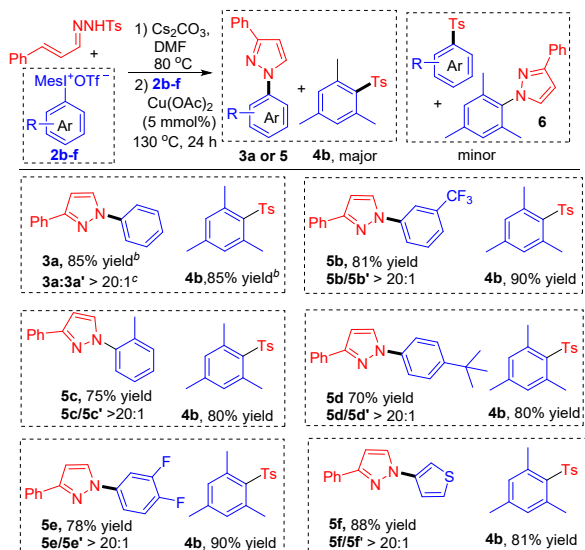

The structure of 5'

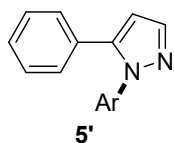

Compound 6 was a minor product

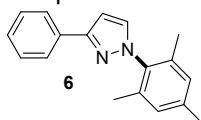

**1-mesityl-3-phenylpyrazole (6)**  $R_f = 0.65$  (EA/PE = 1:10), white solid, <sup>1</sup>H NMR (600 MHz, Chloroform-*d*)  $\delta$  7.92 – 7.88 (m, 2H), 7.46 (d,  $J = 2.3$  Hz, 1H), 7.41 (t,  $J = 7.7$  Hz, 2H), 7.32 (t,  $J = 7.4$  Hz, 1H), 6.97 (s, 2H), 6.77 – 6.74 (m, 1H), 2.34 (s, 3H), 2.05 (s, 6H). <sup>13</sup>C NMR (151 MHz, CHLOROFORM-*D*)  $\delta$  152.09, 138.95, 137.03, 135.97, 133.55, 132.41, 128.95, 128.68, 127.77, 125.83, 103.18, 21.19, 17.43. HRMS calcd for C<sub>18</sub>H<sub>18</sub>N<sub>2</sub> [M+H]<sup>+</sup>: 263.1548, found: 263.1539.

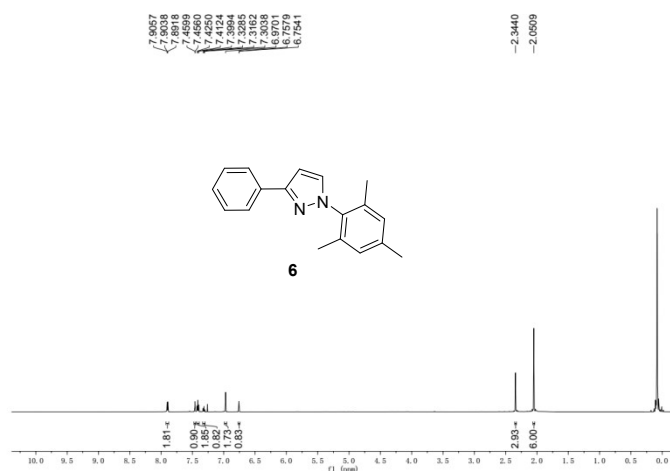

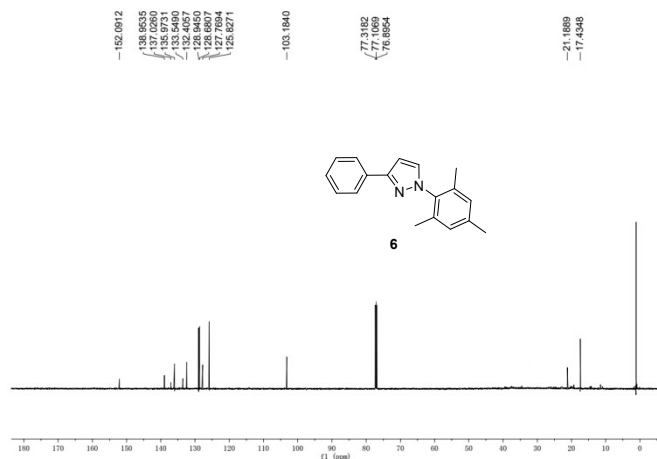

### Scheme 3. Control Experiments

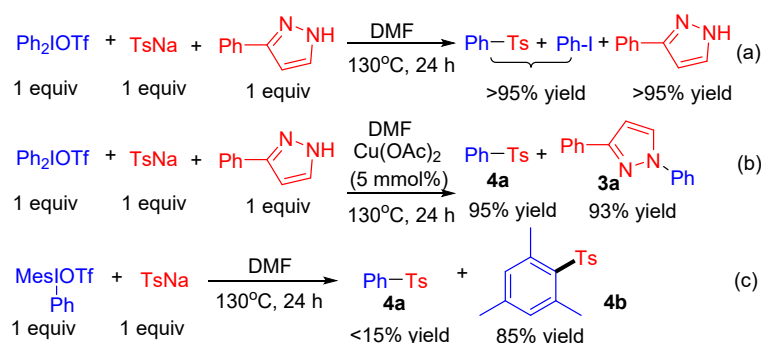

In Scheme 3 (a), it demonstrates that the nucleophilicity of *p*-toluenesulfonyl anion (Ts<sup>-</sup>) is stronger than that of 3-phenyl-pyrazole.

In Scheme 3 (b), While adding Cu(OAc)<sub>2</sub> as catalyst, it provided biphenyl sulfide in 95% yield, and *N*-arylpyrazole in 93% yield. It shows that Cu(OAc)<sub>2</sub> catalyzed the coupling reaction of iodobenzene with 3-phenylpyrazole,

In Scheme 3 (c), it demonstrates that the bond cleavage of *l*-mesityl is faster than that of *l*-phenyl in the mesityl phenyliodonium salts because the intermediate Ar<sup>+</sup> formed *in situ* from 2,4,6-trimethylphenyl are more stable than phenyl ion.

### 3. Synthesis of $\alpha,\beta$ -unsaturated tosylhydrazones<sup>1</sup>

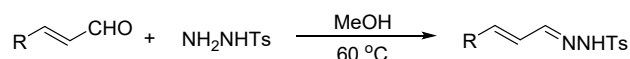

$\alpha,\beta$ -unsaturated aldehydes (5 mmol) was dropped to a solution of pure 4-methylbenzenesulfonylhydrazide (5 mmol) in methanol (5 mL). The mixture was stirred and heated to 60 °C until the  $\alpha,\beta$ -unsaturated aldehydes was completely dissolved. After approximately 0.5-3 hour the crude products was obtained as precipitates. The precipitate was washed by using petroleum ether and dried in *vacuo* to afford the pure products. The reaction provides the  $\alpha,\beta$ -unsaturated tosylhydrazones in about 70-99% yields.

### 4. Synthesis of diphenyliodonium triflate reagents<sup>2</sup>

#### 4.1 Synthesis of Di(phenyl)iodonium Triflate (**2a**)

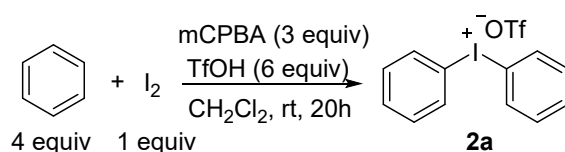

Iodine (2 mmol), benzene (8 mmol), and MCPBA (8 mmol) were dissolved in 10 mL of CH<sub>2</sub>Cl<sub>2</sub>. Then, TfOH (12 mmol) was added to the mixture and the solution was stirred at 40 °C for 15 min. After the solvents were evaporated in vacuo, the residue was submitted to flash chromatography to give **2a** as solid in 65% yield.

#### 4.2 Synthesis of unsymmetrical arylphenyliodonium salts Triflate (**2b**) by in Situ Anion Exchange

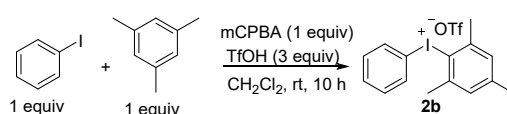

Iodobenzene (2.5mmol), mCPBA10 (2.5 mmol), and 2,4,6-trimethylphen (2.5 mmol) were dissolved in CH<sub>2</sub>Cl<sub>2</sub> (10 mL) and 2,2,2-trifluoroethanol (10 mL). Then, TfOH (2.5 mmol) was added to the solution and the mixture was stirred at r.t. for 10 h and the solution was concentrated in vacuo. Et<sub>2</sub>O (1 mL) was added and the mixture was stirred at r.t. for 10 min to precipitate. The precipitate was filtered off, washed with Et<sub>2</sub>O, and dried to give salt **2b** in 90%.

### 5. General Procedure for the domino reaction and gram scale reaction

#### 5.1 General Procedure for the domino reaction

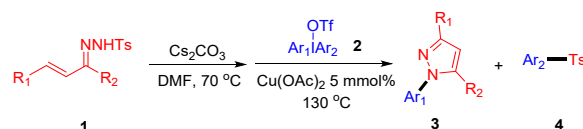

$\alpha$ ,  $\beta$ -unsaturated *N*-tosylhydrazones **1** (0.1 mmol, 1 equiv), Cs<sub>2</sub>CO<sub>3</sub> (0.15 mmol) and DMF (1 mL) were added to a tube. The mixture was stirred at 70 °C for 2-3 h. The reaction mixture was cooled to room temperature. And then, the di(phenyl)iodonium triflate (**2a**, 0.1 mmol, 1 equiv) and Cu(OAc)<sub>2</sub> (0.005 mmol, 0.05 equiv) were added to this tube. The mixture was heated at 130 °C in a preheated oil bath for 24 hours. The reaction mixture was cooled to room temperature, diluted with 5 mL water and extracted with ethyl acetate (3×10 mL). The combined organic phase was washed with water and brine, dried over anhydrous Na<sub>2</sub>SO<sub>4</sub>, and concentrated in vacuo. The residue was purified by flash column chromatograph on silica gel (ethyl acetate/petroleum ether as the eluent) to afford the target products **3** and **4**.

#### 5.2 General Procedure for the gram scale reaction

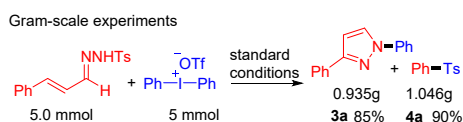

$\alpha$ ,  $\beta$ -unsaturated *N*-tosylhydrazones **1a** (5 mmol, 1 equiv), Cs<sub>2</sub>CO<sub>3</sub> (7.5 mmol) and DMF (10 mL) were added to a tube. The mixture was stirred at 70 °C for 4 h. The reaction mixture was cooled to room temperature. And then, the di(phenyl)iodonium triflate (**2a**, 5 mmol, 1 equiv) and Cu(OAc)<sub>2</sub> (0.25 mmol, 0.05 equiv) were added to this tube. The mixture was heated at 130 °C in a preheated oil bath for 30 hours. The reaction mixture was cooled to room temperature, diluted with 50 mL water and extracted with ethyl acetate (3×20 mL). The combined organic phase was washed with water and brine, dried over anhydrous Na<sub>2</sub>SO<sub>4</sub>, and concentrated in vacuo. The residue was purified by flash column chromatograph on silica gel (ethyl acetate/petroleum ether as the eluent) to afford the target products **3a** and **4a**.

## 6. References

- 1 a) A. J. Xia,; T. R. Kang, L. He, L. M. Chen, W. Y. Li, J. L. Yang, Q. Z. Liu, *Angew. Chem., Int. Ed.*, 2016, **55**, 1441; (b) X. Nie, Y. Wang, L. Yang, Z. Yang, T. Kang, *Tetrahedron Lett.*, 2017, **58**, 3003.;(c) L.Zeng, X.-Q. Guo, Z.-J. Yang, Y. Gan, L.-M. Chen, T.-R. Kang, *Tetrahedron Lett.*, 2019, **60**, 150943; d) L.-M. Chen, J. Zhao, A.-J. Xia, X.-Q. Guo, Y. Gan, C. Zhou, Z.-J. Yang, J. Yang, T.-R. Kang. *Org. Biomol. Chem.*, 2019, **17**, 8561.
- 2 a)M. Bielawski, B. Olofsson, *Chem. Commun.* 2007, 2521;b) M. Bielawski, M. Zhu, B. Olofsson, *Adv. synth. Catal.* 2007, 349, 2610; c) M. Bielawski, B. Olofsson, *Org. Synth.* 2009, 86, 308-314.



## 7. <sup>1</sup>H NMR, <sup>13</sup>C NMR data of compounds

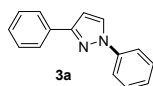

**1,3-diphenyl-1H-pyrazole (3a)**  $R_f = 0.70$  (EA/PE = 1:10), yield 92%, white solid. m.p.

<sup>1</sup>H NMR (400 MHz, Chloroform-*d*)  $\delta$  7.96 (d,  $J = 2.5$  Hz, 1H), 7.95 – 7.92 (m, 2H), 7.81 – 7.76 (m, 2H), 7.51 – 7.41 (m, 4H), 7.38 – 7.27 (m, 2H), 6.79 (d,  $J = 2.5$  Hz, 1H).

<sup>13</sup>C NMR (101 MHz, CDCl<sub>3</sub>)  $\delta$  152.94, 140.26, 133.15, 129.40, 128.64, 128.00, 127.96, 126.31, 125.84, 119.05, 105.01. HRMS calcd for C<sub>15</sub>H<sub>12</sub>N<sub>2</sub> [M+H]<sup>+</sup>: 221.1079, found: 221.1082.

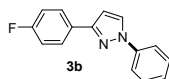

**3-(4-fluorophenyl)-1-phenyl-1H-pyrazole (3b)**  $R_f = 0.75$  (EA/PE = 1:10), yield 91%, white solid.

<sup>1</sup>H NMR (600 MHz, Chloroform-*d*)  $\delta$  7.95 (d,  $J = 2.4$  Hz, 1H), 7.91-7.89 (m, 2H), 7.80 – 7.73 (m, 2H), 7.51 – 7.43 (m, 2H), 7.30 (t,  $J = 7.3$  Hz, 1H), 7.16 – 7.08 (m, 2H), 6.72 (d,  $J = 2.4$  Hz, 1H). <sup>13</sup>C NMR (151 MHz, Chloroform-*d*)  $\delta$  162.85 (d,  $J = 246.7$ Hz), 152.11, 140.22, 129.54, 128.21, 127.64, 127.58, 126.51, 119.11, 115.67 (d,  $J = 21.6$ Hz), 104.92.

HRMS calcd for C<sub>15</sub>H<sub>11</sub>FN<sub>2</sub> [M+H]<sup>+</sup>: 239.0985, found: 239.0987.

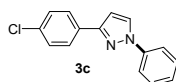

**3-(4-chlorophenyl)-1-phenyl-1H-pyrazole (3c)**  $R_f = 0.72$  (EA/PE = 1:5), yield 88%, white solid.

<sup>1</sup>H NMR (600 MHz, Chloroform-*d*)  $\delta$  7.95 (d,  $J = 2.5$  Hz, 1H), 7.88 – 7.84 (m, 2H), 7.78 – 7.75 (m, 2H), 7.49 – 7.45 (m, 2H), 7.42 – 7.39 (m, 2H), 7.33 – 7.29 (m, 1H), 6.75 (d,  $J = 2.5$  Hz, 1H).

<sup>13</sup>C NMR (151 MHz, CHLOROFORM-*D*)  $\delta$  151.87, 140.17, 133.82, 131.73, 129.56, 128.92, 128.27, 127.16, 126.61, 119.16, 105.07. HRMS calcd for C<sub>15</sub>H<sub>11</sub>ClN<sub>2</sub> [M+H]<sup>+</sup>: 225.0689, found: 255.0693.

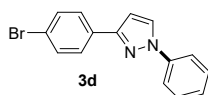

**3-(4-bromophenyl)-1-phenyl-1H-pyrazole (3d)**  $R_f = 0.6$  (EA/PE = 1:5), yield 86%, white solid.

<sup>1</sup>H NMR (600 MHz, Chloroform-*d*)  $\delta$  7.95 (d,  $J = 2.5$  Hz, 1H), 7.81 – 7.78 (m, 2H), 7.78 – 7.75 (m, 2H), 7.57 – 7.54 (m, 2H), 7.49 – 7.46 (m, 2H), 7.33 – 7.29 (m, 1H), 6.75 (d,  $J = 2.5$  Hz, 1H).

<sup>13</sup>C NMR (151 MHz, CHLOROFORM-*D*)  $\delta$  151.88, 140.16, 132.19, 131.86, 129.56, 128.26, 127.46, 126.62, 122.03, 119.15, 105.06. HRMS calcd for C<sub>15</sub>H<sub>11</sub>BrN<sub>2</sub> [M+H]<sup>+</sup>: 299.0184, found: 299.0188.

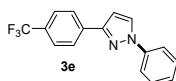

**1-phenyl-3-(4-(trifluoromethyl)phenyl)-1H-pyrazole (3e)**  $R_f = 0.68$  (EA/PE = 1:5), yield 83%, white solid.

<sup>1</sup>H NMR (600 MHz, Chloroform-*d*)  $\delta$  8.03 (d,  $J = 8.0$  Hz, 2H), 7.98 (d,  $J = 2.5$  Hz, 1H), 7.80 – 7.77 (m, 2H), 7.69 (d,  $J = 8.1$  Hz, 2H), 7.51 – 7.47 (m, 2H), 7.35 – 7.31 (m, 1H), 6.82 (d,  $J = 2.5$  Hz, 1H).

$^{13}\text{C}$  NMR (151 MHz, CHLOROFORM-*D*)  $\delta$  151.50, 140.10, 136.64, 129.83 (d,  $J = 32.4$  Hz), 129.60, 128.43, 126.82, 126.01, 125.71 (d,  $J = 3.9$  Hz), 124.39 (d,  $J = 271.8$  Hz), 119.25, 105.48. HRMS calcd for  $\text{C}_{16}\text{H}_{11}\text{F}_3\text{N}_2$   $[\text{M}+\text{H}]^+$ : 289.0953, found: 289.0950.

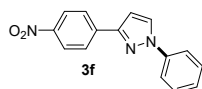

**3-(4-nitrophenyl)-1-phenyl-1H-pyrazole (3f)**  $R_f = 0.30$  (EA/PE = 1:10), yield 95%, yellow solid.

$^1\text{H}$  NMR (600 MHz, Chloroform-*d*)  $\delta$  8.32 – 8.26 (m, 2H), 8.10 – 8.05 (m, 2H), 8.04 – 7.99 (m, 1H), 7.78 (d,  $J = 7.4$  Hz, 2H), 7.50 (t,  $J = 7.0$  Hz, 2H), 7.38 – 7.32 (m, 1H), 6.90 – 6.85 (m, 1H).

$^{13}\text{C}$  NMR (151 MHz, CHLOROFORM-*D*)  $\delta$  150.60, 147.35, 139.94, 139.47, 129.65, 128.74, 127.12, 126.30, 124.21, 119.35, 105.98. HRMS calcd for  $\text{C}_{15}\text{H}_{11}\text{N}_3\text{O}_2$   $[\text{M}+\text{H}]^+$ : 266.0930, found: 266.0935.

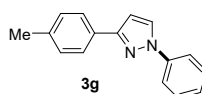

**1-phenyl-3-(p-tolyl)-1H-pyrazole (3g)**  $R_f = 0.51$  (EA/PE = 1:20), yield 93%, white solid.

$^1\text{H}$  NMR (400 MHz, Chloroform-*d*)  $\delta$  7.86 (d,  $J = 2.5$  Hz, 1H), 7.73 (d,  $J = 8.1$  Hz, 2H), 7.70-7.67 (m, 2H), 7.42 – 7.35 (m, 2H), 7.23 – 7.14 (m, 3H), 6.67 (d,  $J = 2.5$  Hz, 1H), 2.31 (s, 3H).

$^{13}\text{C}$  NMR (101 MHz,  $\text{CDCl}_3$ )  $\delta$  153.01, 140.29, 137.81, 130.34, 129.39, 129.34, 127.87, 126.21, 125.74, 119.02, 104.85, 21.32. HRMS calcd for  $\text{C}_{16}\text{H}_{14}\text{N}_2$   $[\text{M}+\text{H}]^+$ : 235.1235, found: 235.1242.

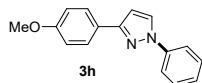

**3-(4-methoxyphenyl)-1-phenyl-1H-pyrazole (3h)**  $R_f = 0.55$  (EA/PE = 1:5), yield 85%, white solid.

$^1\text{H}$  NMR (400 MHz, Chloroform-*d*)  $\delta$  7.94 (d,  $J = 2.5$  Hz, 1H), 7.88 – 7.83 (m, 2H), 7.76 (dd,  $J = 8.6$ , 1.1 Hz, 2H), 7.50 – 7.43 (m, 2H), 7.29 (d,  $J = 6.3$  Hz, 1H), 7.00 – 6.94 (m, 2H), 6.71 (d,  $J = 2.5$  Hz, 1H), 3.86 (s, 3H).

$^{13}\text{C}$  NMR (101 MHz,  $\text{CDCl}_3$ )  $\delta$  159.60, 152.77, 140.26, 129.41, 127.91, 127.11, 126.17, 125.93, 118.95, 114.05, 104.60, 55.34. HRMS calcd for  $\text{C}_{16}\text{H}_{14}\text{N}_2\text{O}$   $[\text{M}+\text{H}]^+$ : 251.1184, found: 251.1187.

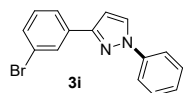

**3-(3-bromophenyl)-1-phenyl-1H-pyrazole (3i)**  $R_f = 0.68$  (EA/PE = 1:5), yield 85%, white solid.  $^1\text{H}$

NMR (600 MHz, Chloroform-*d*)  $\delta$  8.10 (t,  $J = 1.8$  Hz, 1H), 7.95 (d,  $J = 2.5$  Hz, 1H), 7.83 (dt,  $J = 7.7$ , 1.3 Hz, 1H), 7.79 – 7.75 (m, 2H), 7.50 – 7.45 (m, 3H), 7.33 (t,  $J = 1.1$  Hz, 2H), 6.76 (d,  $J = 2.5$  Hz, 1H).  $^{13}\text{C}$  NMR (151 MHz, CHLOROFORM-*D*)  $\delta$  151.48, 140.12, 135.29, 130.96, 130.29, 129.57,

128.86, 128.29, 126.69, 124.45, 122.96, 119.19, 105.24. HRMS calcd for  $\text{C}_{15}\text{H}_{11}\text{BrN}_2$   $[\text{M}+\text{H}]^+$ : 299.0184, found: 299.0188.

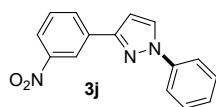

**3-(3-nitrophenyl)-1-phenyl-1H-pyrazole (3j)**  $R_f = 0.48$  (EA/PE = 1:10), yield 92%, yellow solid.  $^1\text{H}$  NMR (600 MHz, Chloroform-*d*)  $\delta$  8.74 (s, 1H), 8.22 (dd,  $J = 45.0, 7.3$  Hz, 2H), 8.03 – 7.98 (m, 1H), 7.78 (d,  $J = 7.4$  Hz, 2H), 7.59 (t,  $J = 7.8$  Hz, 1H), 7.50 (t,  $J = 7.7$  Hz, 2H), 7.37 – 7.30 (m, 1H), 6.88 – 6.83 (m, 1H).  $^{13}\text{C}$  NMR (151 MHz, CHLOROFORM-*D*)  $\delta$  150.61, 148.78, 139.97, 135.03, 131.61, 129.63, 128.64, 126.96, 122.63, 120.70, 119.25, 105.39. HRMS calcd for  $\text{C}_{15}\text{H}_{11}\text{N}_3\text{O}_2[\text{M}+\text{H}]^+$ : 266.0930, found: 266.0938.

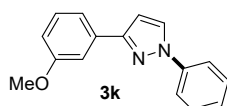

**3-(3-methoxyphenyl)-1-phenyl-1H-pyrazole (3k)**  $R_f = 0.58$  (EA/PE = 1:5), yield 95%, yellow oil.  $^1\text{H}$  NMR (600 MHz, Chloroform-*d*)  $\delta$  7.96 (d,  $J = 2.5$  Hz, 1H), 7.79 – 7.76 (m, 2H), 7.52 – 7.45 (m, 4H), 7.37 – 7.33 (m, 1H), 7.30 (tt,  $J = 7.6, 1.1$  Hz, 1H), 6.91 (dd,  $J = 8.7, 3.1$  Hz, 1H), 6.77 (d,  $J = 2.5$  Hz, 1H), 3.90 (s, 3H).  $^{13}\text{C}$  NMR (151 MHz, CHLOROFORM-*D*)  $\delta$  160.01, 152.87, 140.28, 134.57, 129.76, 129.51, 128.08, 126.46, 119.17, 118.53, 114.08, 111.03, 105.29, 55.43. HRMS calcd for  $\text{C}_{16}\text{H}_{14}\text{N}_2\text{O}[\text{M}+\text{H}]^+$ : 251.1184, found: 251.1189.

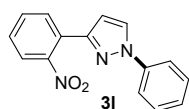

**3-(2-nitrophenyl)-1-phenyl-1H-pyrazole (3l)**  $R_f = 0.45$  (EA/PE = 1:10), yield 90%, Fuchsia oil.  $^1\text{H}$  NMR (600 MHz, Chloroform-*d*)  $\delta$  7.97 (dd,  $J = 2.5, 0.5$  Hz, 1H), 7.84 (dd,  $J = 7.8, 1.3$  Hz, 1H), 7.75 (dd,  $J = 8.1, 1.3$  Hz, 1H), 7.73 – 7.71 (m, 2H), 7.63 – 7.59 (m, 1H), 7.49 – 7.44 (m, 3H), 7.33 – 7.28 (m, 1H), 6.62 (d,  $J = 2.5$  Hz, 1H).  $^{13}\text{C}$  NMR (151 MHz, CHLOROFORM-*D*)  $\delta$  149.28, 148.32, 139.91, 131.92, 130.87, 129.55, 128.75, 127.97, 127.25, 126.86, 123.78, 119.20, 107.06. HRMS calcd for  $\text{C}_{15}\text{H}_{11}\text{N}_3\text{O}_2[\text{M}+\text{H}]^+$ : 266.0930, found: 266.0936.

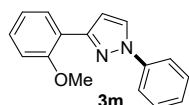

**3-(2-methoxyphenyl)-1-phenyl-1H-pyrazole (3m)**  $R_f = 0.46$  (EA/PE = 1:10), yield 88%, white solid.  $^1\text{H}$  NMR (600 MHz, Chloroform-*d*)  $\delta$  7.89 (d,  $J = 2.5$  Hz, 1H), 7.71 – 7.68 (m, 2H), 7.47 – 7.43 (m, 2H), 7.29 – 7.27 (m, 1H), 7.19 (d,  $J = 35.5$  Hz, 1H), 7.13 – 7.11 (m, 1H), 7.08 – 7.07 (m, 1H), 6.83 (ddd,  $J = 8.2, 2.6, 0.8$  Hz, 1H), 6.68 (d,  $J = 2.5$  Hz, 1H), 3.84 (s, 3H).  $^{13}\text{C}$  NMR (151 MHz, CHLOROFORM-*D*)  $\delta$  159.95, 152.25, 140.11, 138.56, 130.80, 129.76, 129.56, 127.98, 126.46, 120.87, 119.44, 119.03, 113.84, 111.46, 105.11, 55.33. HRMS calcd for  $\text{C}_{16}\text{H}_{14}\text{N}_2\text{O}[\text{M}+\text{H}]^+$ : 251.1184, found: 251.1187.

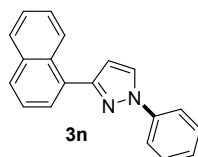

**3-(naphthalen-1-yl)-1-phenyl-1H-pyrazole (3n)**  $R_f = 0.78$  (EA/PE = 1:5), yield 84%, yellow oil.  $^1\text{H}$  NMR (600 MHz, Chloroform-*d*)  $\delta$  8.68 – 8.64 (m, 1H), 8.07 (d,  $J = 2.4$  Hz, 1H), 7.93 – 7.89 (m, 2H), 7.84 (dd,  $J = 8.6, 1.0$  Hz, 2H), 7.81 – 7.78 (m, 1H), 7.57 – 7.52 (m, 3H), 7.52 – 7.48 (m, 2H), 7.32 (t,  $J = 7.4$  Hz, 1H), 6.80 (d,  $J = 8.6$  Hz).  $^{13}\text{C}$  NMR (151 MHz, CHLOROFORM-*D*)  $\delta$  152.98, 140.32, 134.10, 131.48, 131.22, 129.55, 128.72, 128.43, 127.34, 126.50, 126.47, 126.33, 125.92, 125.46, 119.17, 108.95. HRMS calcd for  $\text{C}_{19}\text{H}_{14}\text{N}_2$   $[\text{M}+\text{H}]^+$ : 271.1235, found: 271.1238.

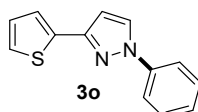

**1-phenyl-3-(thiophen-2-yl)-1H-pyrazole (3o)**  $R_f = 0.50$  (EA/PE = 1:10), yield 75%, yellow oil.  $^1\text{H}$  NMR (600 MHz, Chloroform-*d*)  $\delta$  7.92 (d,  $J = 2.4$  Hz, 1H), 7.74 (d,  $J = 8.5$  Hz, 2H), 7.46 (t,  $J = 8.0$  Hz, 2H), 7.42 (dd,  $J = 3.5, 1.0$  Hz, 1H), 7.32 – 7.27 (m, 2H), 7.09 (dd,  $J = 4.9, 3.6$  Hz, 1H), 6.68 (d,  $J = 2.3$  Hz, 1H).  $^{13}\text{C}$  NMR (151 MHz, CHLOROFORM-*D*)  $\delta$  148.32, 140.05, 136.44, 129.51, 128.09, 127.55, 126.50, 125.02, 124.29, 119.16, 105.17. HRMS calcd for  $\text{C}_{13}\text{H}_{10}\text{N}_2\text{S}$   $[\text{M}+\text{H}]^+$ : 227.0643, found: 227.0647.

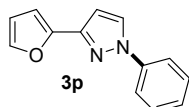

**3-(furan-2-yl)-1-phenyl-1H-pyrazole (3p)**  $R_f = 0.75$  (EA/PE = 1:5), yield 84%, colourless oil.  $^1\text{H}$  NMR (600 MHz, Chloroform-*d*)  $\delta$  7.92 (d,  $J = 2.5$  Hz, 1H), 7.75 – 7.73 (m, 2H), 7.50 (dd,  $J = 1.8, 0.8$  Hz, 1H), 7.48 – 7.44 (m, 2H), 7.30 (t,  $J = 7.4$  Hz, 1H), 6.78 (dd,  $J = 3.3, 0.8$  Hz, 1H), 6.70 (d,  $J = 2.5$  Hz, 1H), 6.50 (dd,  $J = 3.3, 1.8$  Hz, 1H).  $^{13}\text{C}$  NMR (151 MHz, CHLOROFORM-*D*)  $\delta$  148.61, 145.52, 142.23, 140.04, 129.51, 127.96, 126.64, 119.35, 111.48, 106.56, 105.05. HRMS calcd for  $\text{C}_{13}\text{H}_{10}\text{N}_2\text{O}$   $[\text{M}+\text{H}]^+$ : 211.0871, found: 211.0877.

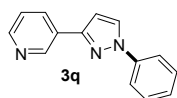

**3-(1-phenyl-1H-pyrazol-3-yl)pyridine (3q)**  $R_f = 0.42$  (EA/PE = 1:2), yield 75%, yellow oil.  $^1\text{H}$  NMR (600 MHz, Chloroform-*d*)  $\delta$  9.13 (s, 1H), 8.58 (d,  $J = 3.6$  Hz, 1H), 8.25 – 8.21 (m, 1H), 8.00 (d,  $J = 2.5$  Hz, 1H), 7.80 – 7.76 (m, 2H), 7.51 – 7.46 (m, 2H), 7.36 (dd,  $J = 7.9, 4.8$  Hz, 1H), 7.34 – 7.30 (m, 1H), 6.83 (d,  $J = 2.5$  Hz, 1H).  $^{13}\text{C}$  NMR (151 MHz, CHLOROFORM-*D*)  $\delta$  150.02, 149.10, 147.40, 140.07, 133.08, 129.59, 128.41, 126.81, 125.42, 123.68, 119.23, 105.17. HRMS calcd for  $\text{C}_{14}\text{H}_{11}\text{N}_3$   $[\text{M}+\text{H}]^+$ : 222.1031, found: 222.1037.

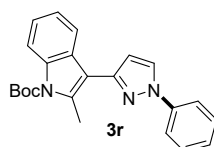

**tert-butyl 2-methyl-3-(1-phenyl-1H-pyrazol-3-yl)-1H-indole-1-carboxylate (3r)**  $R_f = 0.80$  (EA/PE = 1:3), yield 84%, white solid,  $^1\text{H NMR}$  (600 MHz, Chloroform-*d*)  $\delta$  8.18 (d,  $J = 8.1$  Hz, 1H), 8.06 (d,  $J = 2.4$  Hz, 1H), 7.97 – 7.94 (m, 1H), 7.84 – 7.80 (m, 2H), 7.50 – 7.46 (m, 2H), 7.33 – 7.26 (m, 3H), 6.72 – 6.70 (m, 1H), 2.85 (s, 3H), 1.73 (s, 9H).  $^{13}\text{C NMR}$  (151 MHz, CHLOROFORM-*D*)  $\delta$  150.86, 147.32, 140.32, 136.04, 135.65, 129.51, 128.92, 127.12, 126.28, 123.81, 123.01, 119.85, 118.93, 115.34, 113.27, 108.39, 83.96, 28.40, 15.39. HRMS calcd for  $\text{C}_{23}\text{H}_{23}\text{N}_3\text{O}_2$   $[\text{M}+\text{H}]^+$ : 374.1869, found: 374.1872.

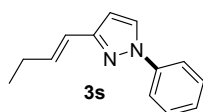

**(E)-3-(but-1-en-1-yl)-1-phenyl-1H-pyrazole (3s)**  $R_f = 0.65$  (EA/PE = 1:10), yield 92%, colourless oil.  $^1\text{H NMR}$  (600 MHz, Chloroform-*d*)  $\delta$  7.83 (dd,  $J = 2.5, 0.6$  Hz, 1H), 7.68 – 7.65 (m, 2H), 7.45 – 7.41 (m, 2H), 7.27 – 7.24 (m, 1H), 6.53 – 6.48 (m, 2H), 6.39 (dt,  $J = 16.0, 6.3$  Hz, 1H), 2.29 – 2.23 (m, 2H), 1.11 (t,  $J = 7.4$  Hz, 3H).  $^{13}\text{C NMR}$  (151 MHz, CHLOROFORM-*D*)  $\delta$  152.75, 140.22, 135.38, 129.46, 127.62, 126.14, 120.93, 118.92, 104.43, 25.97, 13.38. HRMS calcd for  $\text{C}_{13}\text{H}_{14}\text{N}_2$   $[\text{M}+\text{H}]^+$ : 199.1235, found: 199.1238.

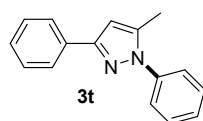

**5-methyl-1,3-diphenyl-1H-pyrazole (3t)**  $R_f = 0.63$  (EA/PE = 1:10), yield 65%, yellow oil.  $^1\text{H NMR}$  (400 MHz, Chloroform-*d*)  $\delta$  7.87 (d,  $J = 8.1$  Hz, 2H), 7.57 – 7.47 (m, 4H), 7.43 – 7.36 (m, 3H), 7.32 (tt,  $J = 6.8, 1.3$  Hz, 1H), 6.54 (s, 1H), 2.39 (d,  $J = 0.6$  Hz, 3H).  $^{13}\text{C NMR}$  (101 MHz,  $\text{CDCl}_3$ )  $\delta$  151.53, 140.15, 139.98, 133.37, 129.09, 128.56, 127.75, 127.61, 125.73, 125.00, 104.38, 12.59. HRMS calcd for  $\text{C}_{16}\text{H}_{14}\text{N}_2$   $[\text{M}+\text{H}]^+$ : 235.1235, found: 235.1233.

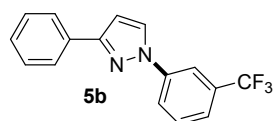

**3-phenyl-1-(3-(trifluoromethyl)phenyl)-1H-pyrazole (5b)**  $R_f = 0.55$  (EA/PE = 1:10), yield 81%, oil.  $^1\text{H NMR}$  (600 MHz, Chloroform-*d*)  $\delta$  8.08 (s, 1H), 8.03 – 7.99 (m, 1H), 7.98 – 7.90 (m, 3H), 7.63 – 7.52 (m, 2H), 7.48 – 7.42 (m, 2H), 7.39 – 7.35 (m, 1H), 6.83 (d,  $J = 2.5$  Hz, 1H).  $^{13}\text{C NMR}$  (151 MHz, CHLOROFORM-*D*)  $\delta$  153.66, 140.57, 132.74, 132.09 (d,  $J = 32.4$  Hz) 130.13, 129.90 (d,  $J = 4.3$  Hz), 128.81, 128.44, 128.03, 125.99, 122.81 (d,  $J = 3.0$  Hz), 121.79, 115.85 (q,  $J = 3.7$  Hz), 105.89. HRMS calcd for  $\text{C}_{16}\text{H}_{11}\text{F}_3\text{N}_2$   $[\text{M}+\text{H}]^+$ : 289.0953, found: 289.0958.

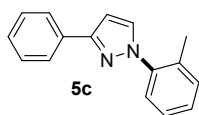

**3-phenyl-1-(o-tolyl)-1H-pyrazole (5c)**  $R_f = 0.70$  (EA/PE = 1:20), yield 75%, oil.  $^1\text{H NMR}$  (600 MHz, Chloroform-*d*)  $\delta$  7.93 – 7.89 (m, 2H), 7.63 (d,  $J = 2.4$  Hz, 1H), 7.44 – 7.40 (m, 3H), 7.32 (ddt,  $J = 14.5, 6.3, 1.8$  Hz, 4H), 6.76 (d,  $J = 2.4$  Hz, 1H), 2.33 (s, 3H).  $^{13}\text{C NMR}$  (151 MHz, CHLOROFORM-*D*)  $\delta$  152.36, 140.10, 133.83, 133.37, 131.99, 131.45, 128.70, 128.48, 127.91, 126.71, 126.20, 125.84, 103.63, 18.32. HRMS calcd for  $\text{C}_{16}\text{H}_{14}\text{N}_2$   $[\text{M}+\text{H}]^+$ : 235.1235, found: 235.1237.

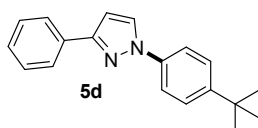

**1-(4-(tert-butyl)phenyl)-3-phenyl-1H-pyrazole (5d)**  $R_f = 0.65$  (EA/PE = 1:20), yield 70%, white solid.  $^1\text{H NMR}$  (600 MHz, Chloroform-*d*)  $\delta$  7.94 – 7.91 (m, 3H), 7.70 – 7.67 (m, 2H), 7.50 – 7.47 (m, 2H), 7.46 – 7.42 (m, 2H), 7.34 (tt,  $J = 6.9, 1.2$  Hz, 1H), 6.76 (d,  $J = 2.5$  Hz, 1H), 1.36 (s, 9H).  $^{13}\text{C NMR}$  (151 MHz, CHLOROFORM-*D*)  $\delta$  152.75, 149.58, 137.98, 133.32, 128.71, 128.06, 128.00, 126.35, 125.88, 118.98, 104.81, 34.65, 31.45. HRMS calcd for  $\text{C}_{19}\text{H}_{20}\text{N}_2$   $[\text{M}+\text{H}]^+$ : 277.1705, found: 277.1713.

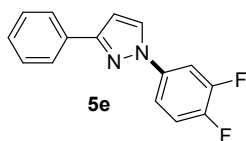

**1-(3,4-difluorophenyl)-3-phenyl-1H-pyrazole (5e)**  $R_f = 0.70$  (EA/PE = 1:10), yield 78%, yellow solid.  $^1\text{H NMR}$  (600 MHz, Chloroform-*d*)  $\delta$  7.91 – 7.89 (m, 2H), 7.89 (d,  $J = 2.5$  Hz, 1H), 7.69 (ddd,  $J = 11.3, 6.9, 2.7$  Hz, 1H), 7.49 – 7.42 (m, 3H), 7.38 – 7.35 (m, 1H), 7.28–7.23 (m, 1H), 6.79 (d,  $J = 2.5$  Hz, 1H).  $^{13}\text{C NMR}$  (151 MHz, CHLOROFORM-*D*)  $\delta$  153.46, 150.68 (dd,  $J = 249.2, 13.5$  Hz), 148.76 (dd,  $J = 248.0, 12.7$  Hz), 136.82 (dd,  $J = 8.4, 2.4$  Hz), 132.74, 128.81, 128.40, 128.09, 125.93, 117.91 (d,  $J = 18.6$  Hz), 114.36 (dd,  $J = 5.7, 3.3$  Hz), 109.00 (d,  $J = 21.7$  Hz), 105.71. HRMS calcd for  $\text{C}_{15}\text{H}_{10}\text{F}_2\text{N}_2$   $[\text{M}+\text{H}]^+$ : 257.0890, found: 257.0894.

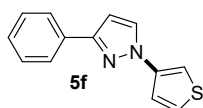

**3-phenyl-1-(thiophen-3-yl)-1H-pyrazole (5f)**  $R_f = 0.55$  (EA/PE = 1:10), yield 88%, white solid,  $^1\text{H NMR}$  (600 MHz, Chloroform-*d*)  $\delta$  7.91 – 7.89 (m, 2H), 7.83 (d,  $J = 2.6$  Hz, 1H), 7.45 – 7.41 (m, 4H), 7.39 (dd,  $J = 5.1, 3.3$  Hz, 1H), 7.36 – 7.32 (m, 1H), 6.73 (d,  $J = 2.5$  Hz, 1H).  $^{13}\text{C NMR}$  (151 MHz, CHLOROFORM-*D*)  $\delta$  152.62, 139.97, 133.06, 128.85, 128.74, 128.12, 126.51, 125.92, 120.40, 110.68, 104.54. HRMS calcd for  $\text{C}_{13}\text{H}_{10}\text{N}_2\text{S}$   $[\text{M}+\text{H}]^+$ : 226.0565, found: 226.0569.

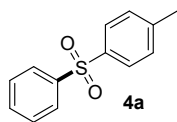

**1-methyl-4-(phenylsulfonyl)benzene (4a)**  $R_f = 0.45$  (EA/PE = 1:5), white solid.  $^1\text{H}$  NMR (400 MHz, Chloroform-*d*)  $\delta$  7.96 – 7.90 (m, 2H), 7.83 (d,  $J = 8.3$  Hz, 2H), 7.58 – 7.46 (m, 3H), 7.29 (d,  $J = 8.0$  Hz, 2H), 2.39 (s, 3H).  $^{13}\text{C}$  NMR (101 MHz,  $\text{CDCl}_3$ )  $\delta$  144.13, 142.02, 138.68, 132.96, 129.89, 129.19, 127.72, 127.49, 21.55. HRMS calcd for  $\text{C}_{13}\text{H}_{12}\text{O}_2\text{S}[\text{M}+\text{H}]^+$ : 233.0636, found: 233.0639.

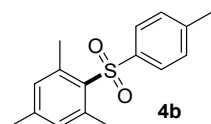

**1,3,5-trimethyl-2-tosylbenzene (4b)**  $R_f = 0.45$  (EA/PE = 1:10), white solid.  $^1\text{H}$  NMR (600 MHz, Chloroform-*d*)  $\delta$  7.68 (d,  $J = 8.4$  Hz, 2H), 7.27 (s, 2H), 6.94 (s, 2H), 2.60 (s, 6H), 2.40 (s, 3H), 2.30 (s, 3H).  $^{13}\text{C}$  NMR (151 MHz, CHLOROFORM-*D*)  $\delta$  143.46, 143.27, 140.69, 140.03, 134.22, 132.25, 129.55, 126.39, 22.92, 21.63, 21.10. HRMS calcd for  $\text{C}_{16}\text{H}_{18}\text{O}_2\text{S}[\text{M}+\text{H}]^+$ : 275.1106, found: 275.1112.

## 8. NMR spectra for compounds

7.9639  
7.9577  
7.9489  
7.9451  
7.9312  
7.9277  
7.9247  
7.7975  
7.7942  
7.7805  
7.7783  
7.7755  
7.7730  
7.4959  
7.4773  
7.4743  
7.4666  
7.4641  
7.4601  
7.4560  
7.4462  
7.4425  
7.4305  
7.4265  
7.3725  
7.3697  
7.3669  
7.3558  
7.3514  
7.3465  
7.3330  
7.3177  
7.2892  
7.2806  
6.7890  
6.7827

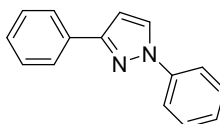

**3a**

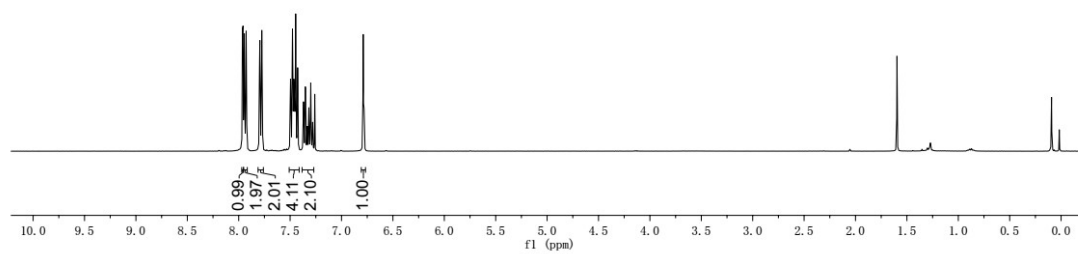

152.9439  
140.2613  
133.1546  
129.3965  
128.6350  
127.9955  
127.9627  
126.3111  
125.8442  
119.0529  
105.0115  
77.3315  
76.8827  
76.6976

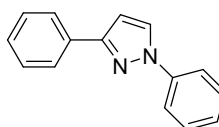

**3a**

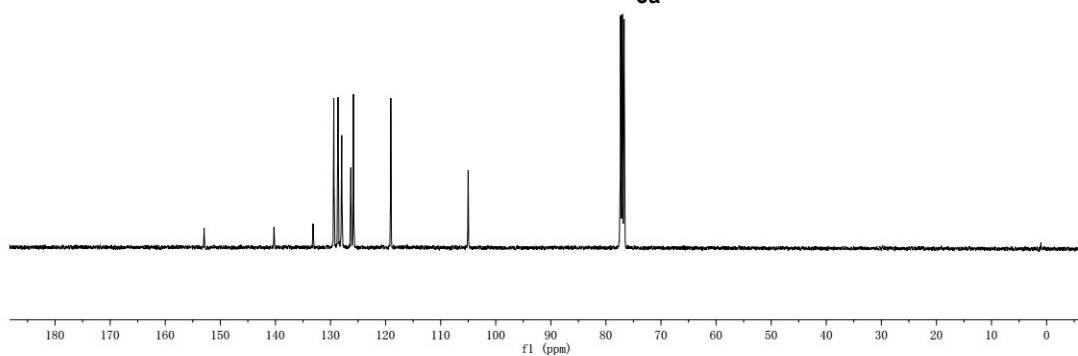



7.9490  
7.9451  
7.9102  
7.9063  
7.9012  
7.8990  
7.8976  
7.8956  
7.8903  
7.8866  
7.7743  
7.7726  
7.7601  
7.4879  
7.4754  
7.4643  
7.4615  
7.3155  
7.3032  
7.2910  
7.1447  
7.1411  
7.1302  
7.1191  
7.1157  
6.7257  
6.7217

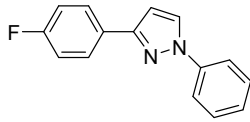

**3b**

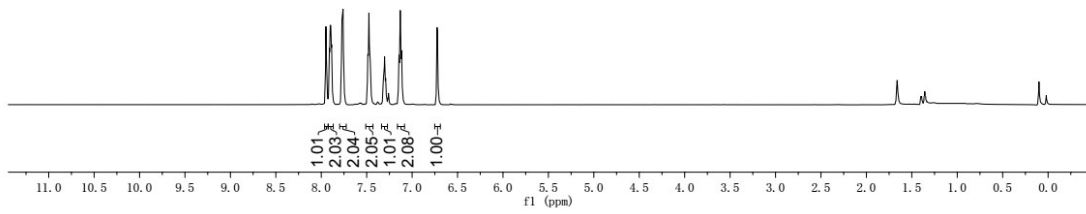

163.6675  
162.0330  
152.1149  
140.2216  
128.5414  
125.2068  
121.5366  
126.5971  
119.1105  
115.7369  
115.5839  
104.9154  
77.3504  
77.3300  
76.9269

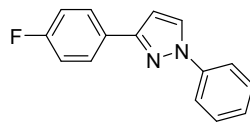

**3b**

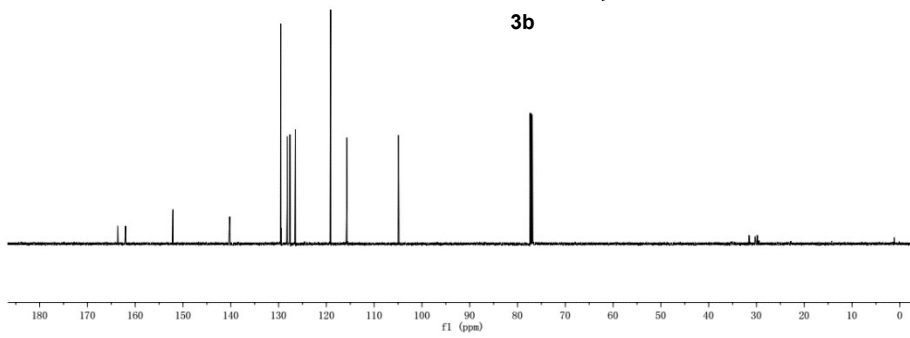

7.9543  
7.9501  
7.8704  
7.8663  
7.8630  
7.8553  
7.8520  
7.8479  
7.7739  
7.7712  
7.7693  
7.7660  
7.7598  
7.7584  
7.7567  
7.7551  
7.7514  
7.4826  
7.4896  
7.4862  
7.4771  
7.4754  
7.4660  
7.4629  
7.4594  
7.4162  
7.4088  
7.4011  
7.3937  
7.3224  
7.3206  
7.3189  
7.3082  
7.2876  
7.2959  
7.2941  
6.7478  
6.7436

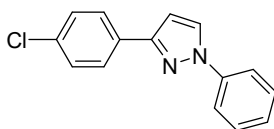

**3c**

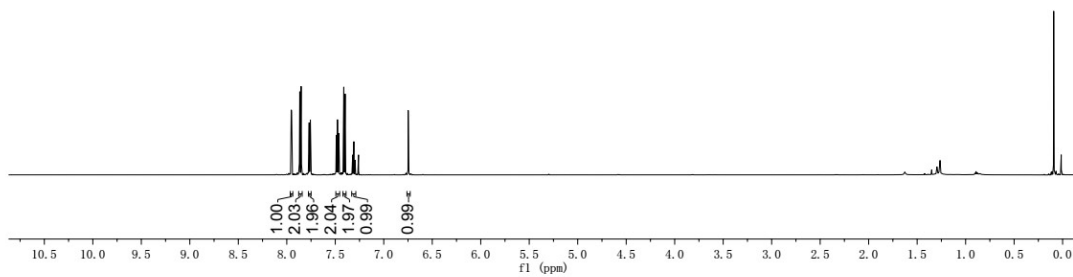

151.8729  
140.1672  
133.8241  
131.7301  
129.5574  
128.9235  
128.2724  
127.1566  
126.6077  
119.1571  
105.0673  
77.3500  
77.1384  
76.9269

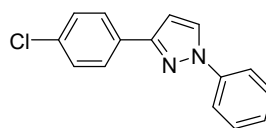

**3c**

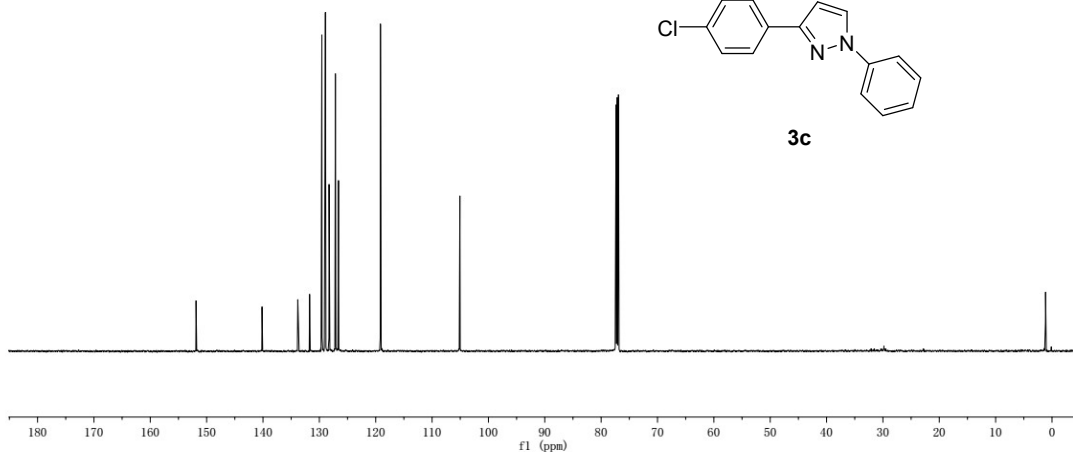

7.9504  
7.9463  
7.8086  
7.8046  
7.8013  
7.7936  
7.7903  
7.7863  
7.7699  
7.7680  
7.7566  
7.7551  
7.7554  
7.7537  
7.5684  
7.5644  
7.5611  
7.5534  
7.5501  
7.5461  
7.4910  
7.4879  
7.4845  
7.4754  
7.4737  
7.4643  
7.4612  
7.4578  
7.3221  
7.3203  
7.3185  
7.3079  
7.2973  
7.2955  
7.2938  
6.7481  
6.7439

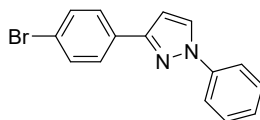

**3d**

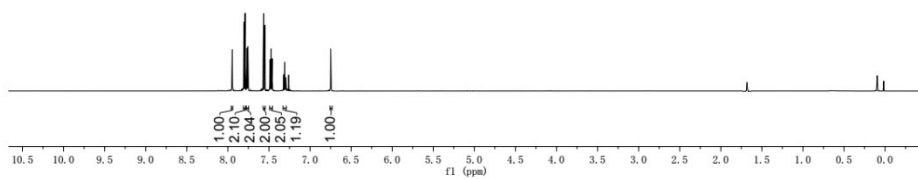

-151.8758  
-140.1643  
-132.1903  
-131.8616  
-130.5568  
-128.2643  
-127.4645  
-126.6152  
-122.0317  
-119.1467  
-105.0630

77.3688  
77.1588  
76.9463

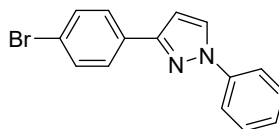

**3d**

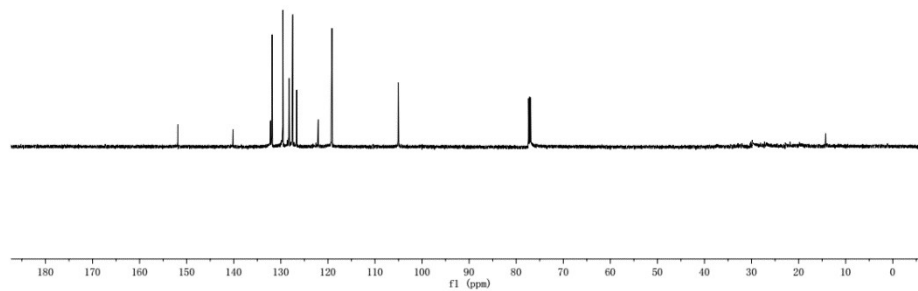

8.0395  
8.0261  
7.9783  
7.9742  
7.7885  
7.7867  
7.7757  
7.7741  
7.7726  
7.6957  
7.6822  
7.5042  
7.4917  
7.4902  
7.4776  
7.3418  
6.8285  
6.8140

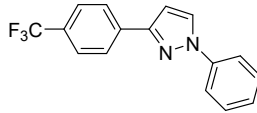

**3e**

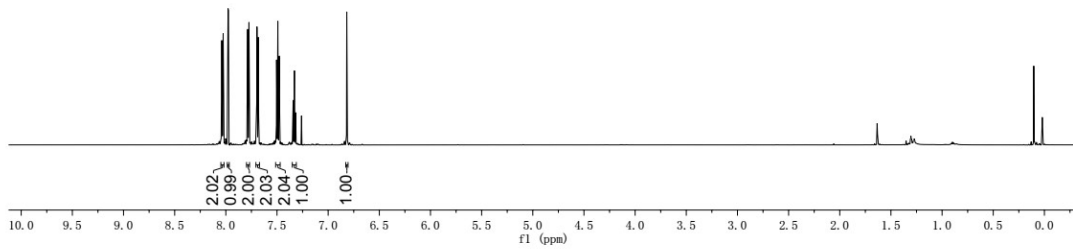

151.5016  
140.1013  
136.6361  
129.9342  
129.7192  
128.5950  
128.4270  
126.8184  
126.0130  
125.7253  
125.6997  
125.2867  
123.4858  
119.2524  
105.4752

77.3439  
77.1320  
76.9196

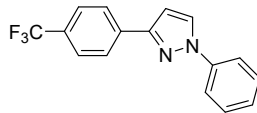

**3e**

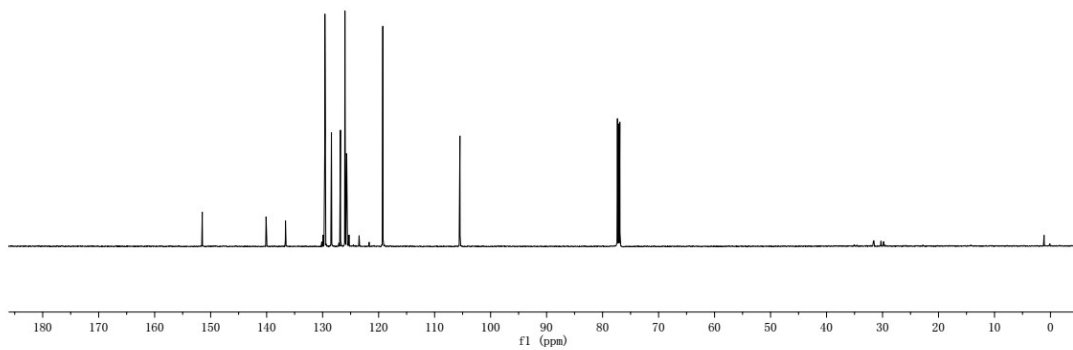

8.2996  
8.2853  
8.0841  
8.0724  
8.0700  
8.0167  
8.0128  
7.7887  
7.7764  
7.5153  
7.5030  
7.4919  
7.3603  
7.3499  
7.3379  
6.8791  
6.8753

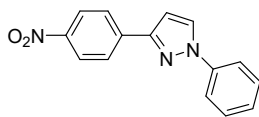

**3f**

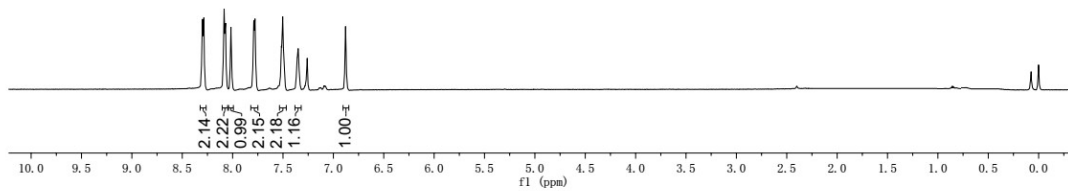

150.5997  
147.3473  
139.9428  
139.4664  
129.6509  
128.7372  
127.1233  
126.2923  
124.2111  
119.3460  
105.9751  
77.3137  
77.1017  
76.8898

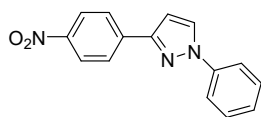

**3f**

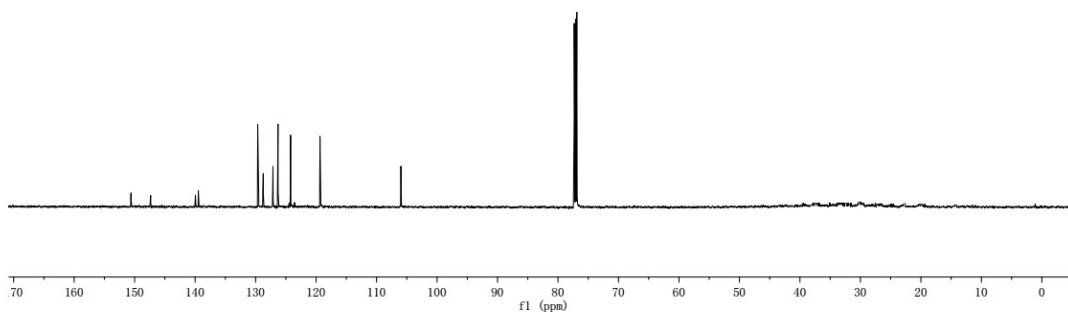

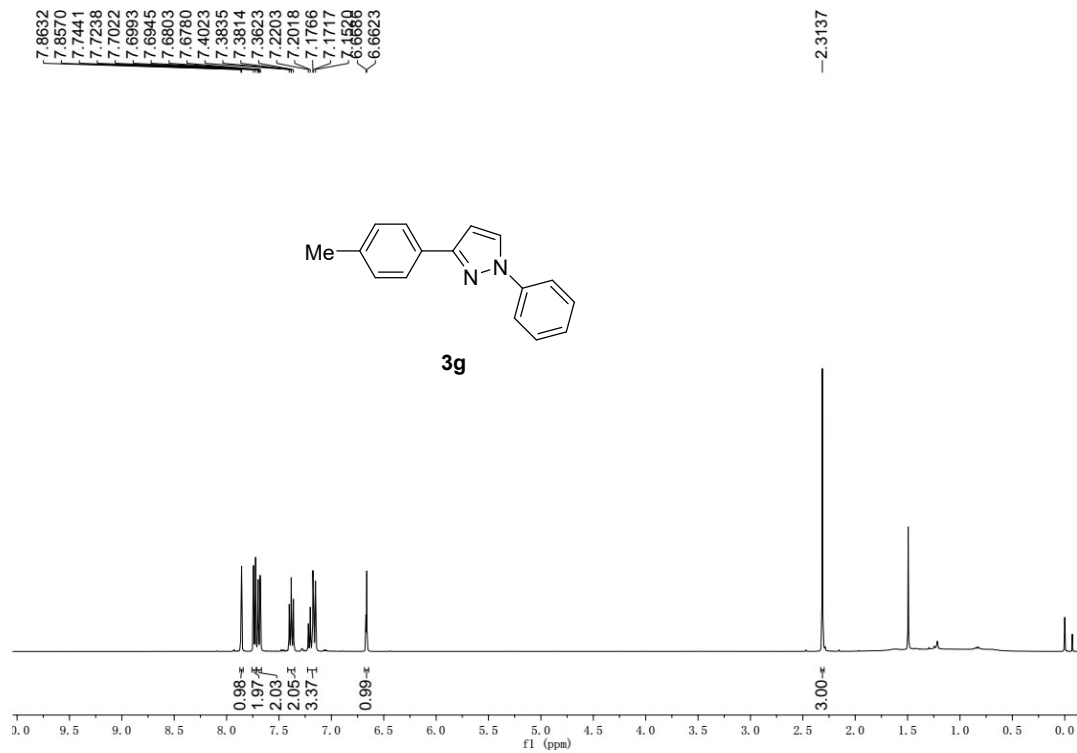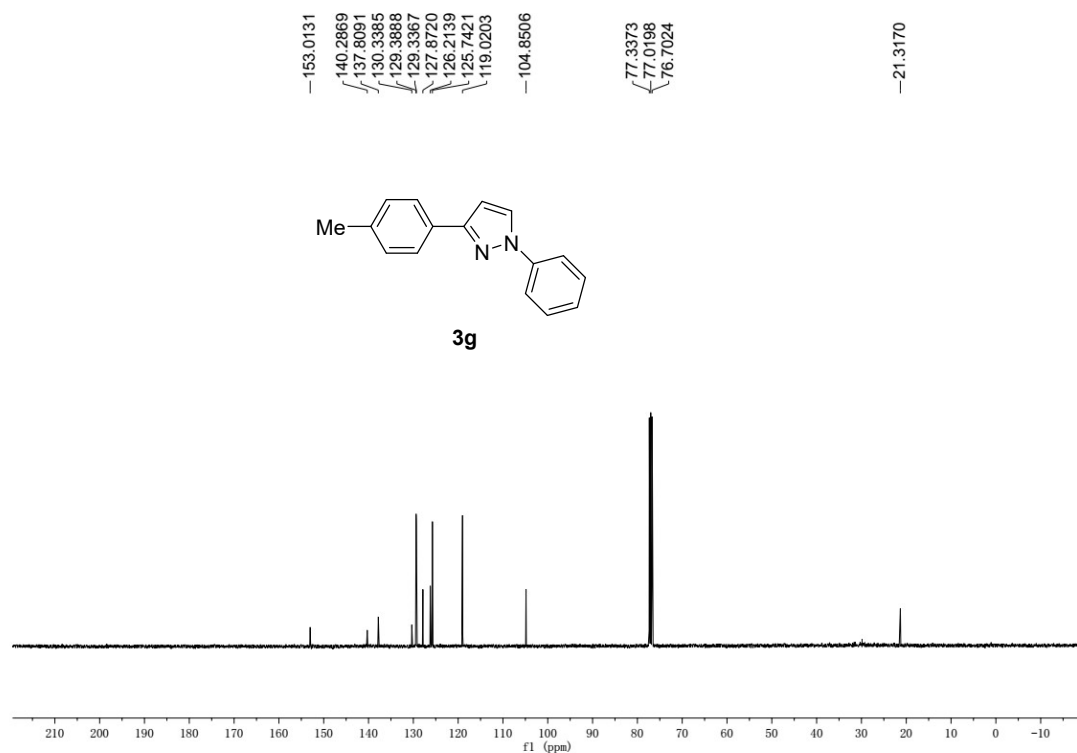

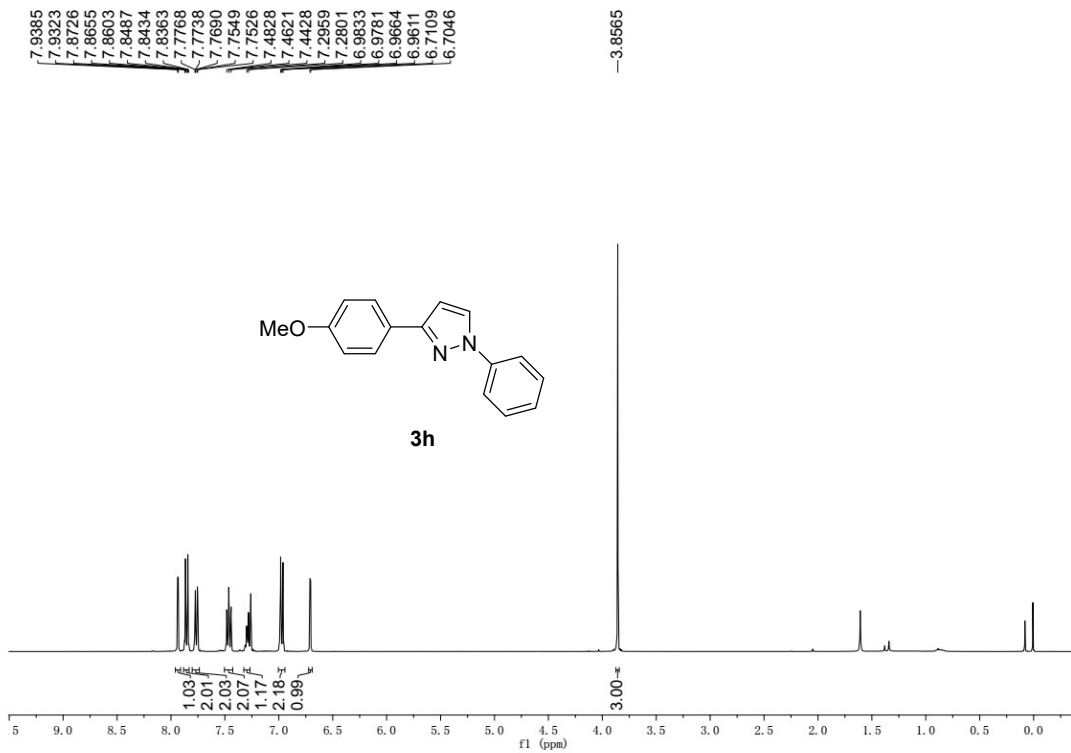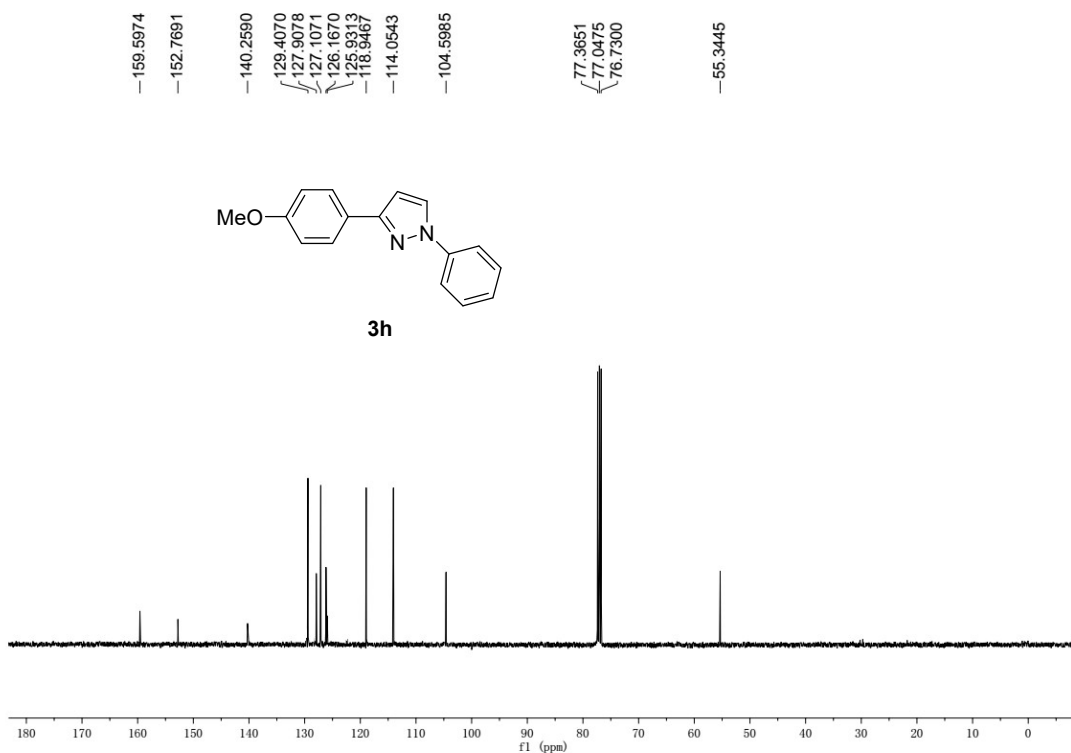

8.1042  
8.1013  
8.0983  
7.9560  
7.9518  
7.8433  
7.8415  
7.8390  
7.8304  
7.8285  
7.8261  
7.7764  
7.7745  
7.7713  
7.7636  
7.7619  
7.7603  
7.7567  
7.4961  
7.4930  
7.4896  
7.4838  
7.4805  
7.4788  
7.4764  
7.4729  
7.4712  
7.4695  
7.4663  
7.4630  
7.4613  
7.4597  
7.4580  
7.3274  
7.3256  
7.3239  
7.3131  
7.3119  
7.3027  
7.3008  
7.2989  
7.2857  
6.7579  
6.7537

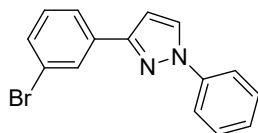

**3i**

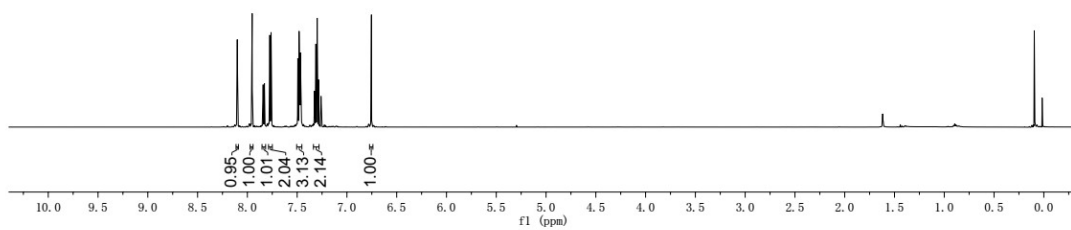

151.4784  
140.1247  
135.2902  
130.9622  
130.2948  
129.5742  
128.8550  
128.2916  
126.6865  
124.4504  
122.9607  
119.1869  
105.2374  
77.3625  
77.1504  
76.9383

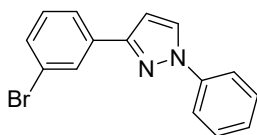

**3i**

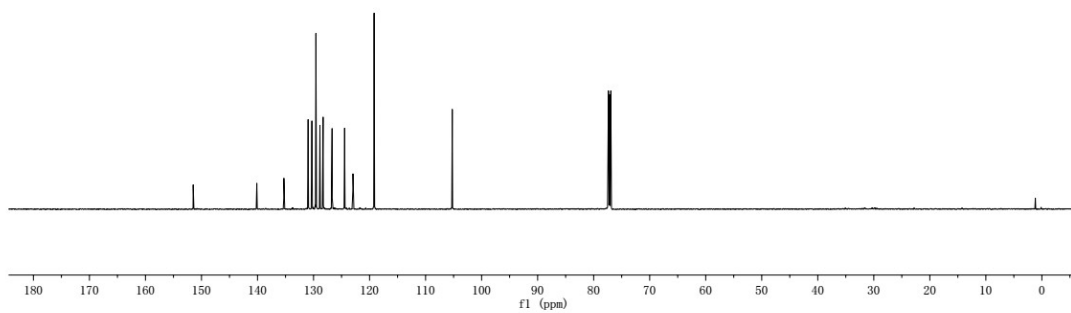



8.7410  
8.2604  
8.2478  
8.1849  
8.1733  
8.0125  
8.0094  
7.7911  
7.7788  
7.6070  
7.5940  
7.5810  
7.5107  
7.4982  
7.4851  
7.3486  
7.3365  
7.3254  
6.8601  
6.8572

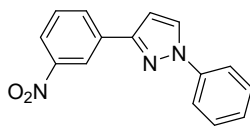

3j

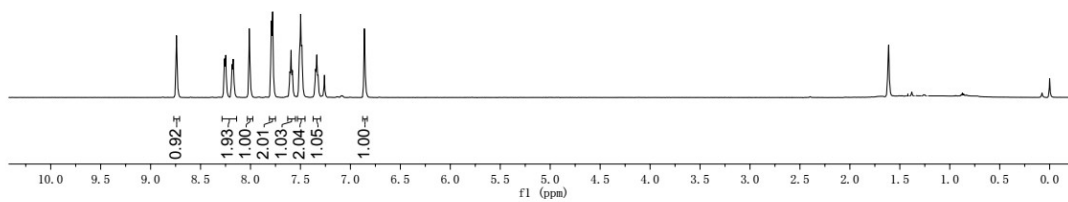

150.6068  
148.7788  
139.9690  
135.0270  
131.6113  
129.6292  
128.6377  
126.9633  
122.6298  
120.6999  
119.2538  
105.3905  
77.3302  
77.1184  
76.9069

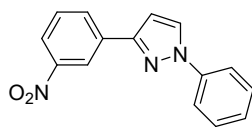

3j

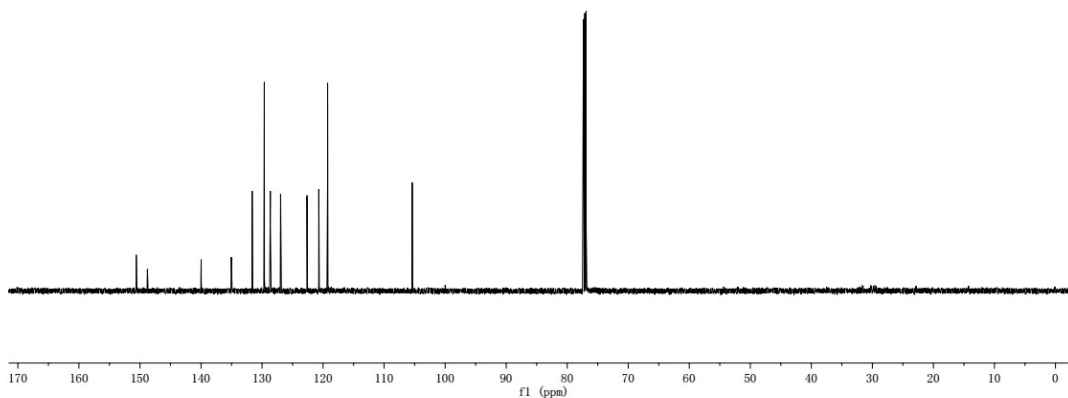

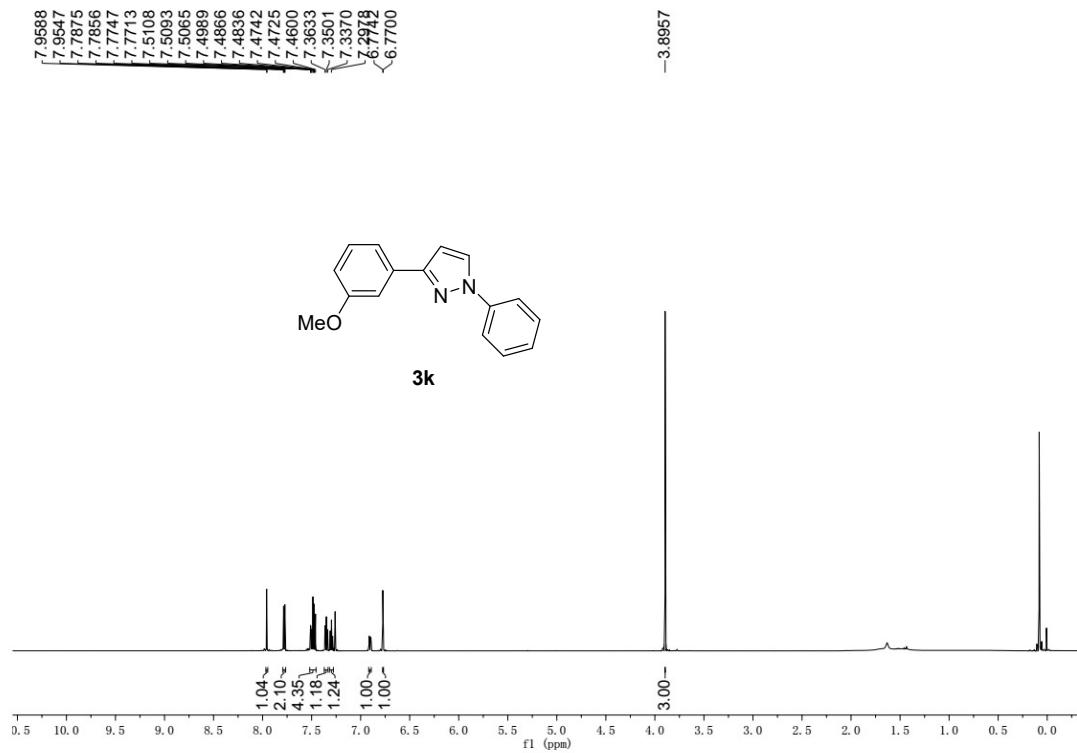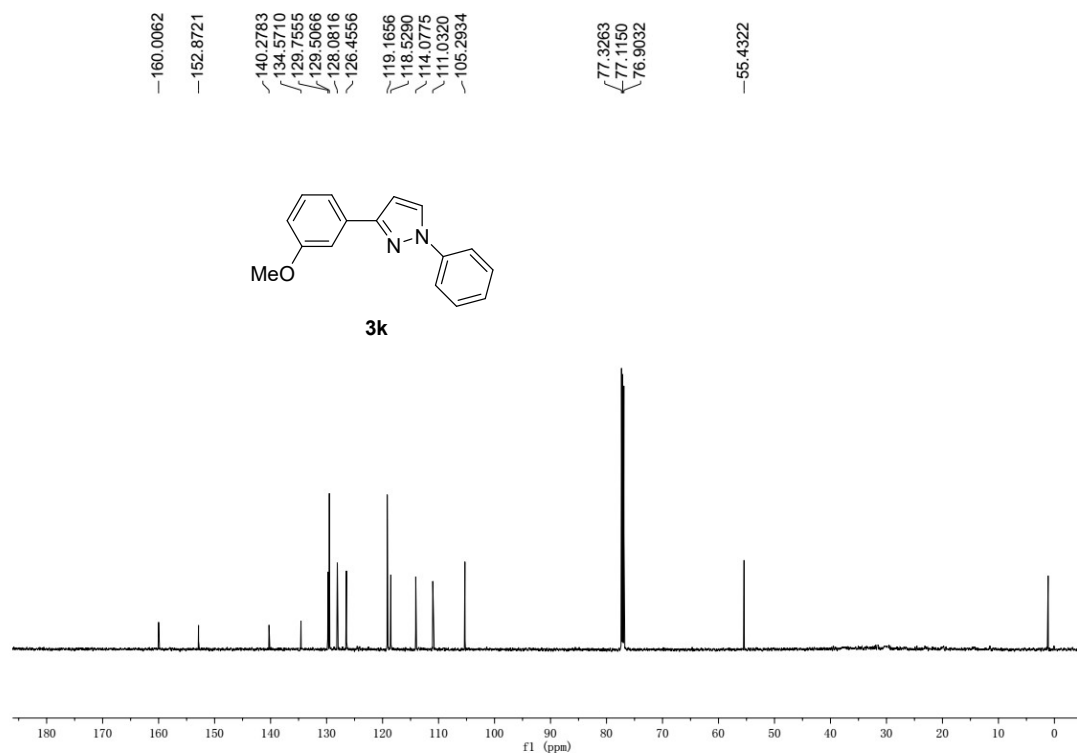

7.9701  
7.9693  
7.9660  
7.9652  
7.8489  
7.8466  
7.8359  
7.8337  
7.7546  
7.7525  
7.7411  
7.7390  
7.7330  
7.7318  
7.7302  
7.7283  
7.7272  
7.7249  
7.7189  
7.7175  
7.7157  
7.7140  
7.7104  
7.6255  
7.6236  
7.6111  
7.6098  
7.5969  
7.4905  
7.4892  
7.4881  
7.4869  
7.4769  
7.4742  
7.4706  
7.4646  
7.4609  
7.4593  
7.4491  
7.4468  
7.3176  
7.3157  
7.3050  
7.3035  
7.2929  
6.6222  
6.6180

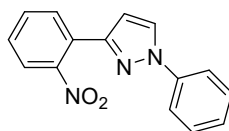

**31**

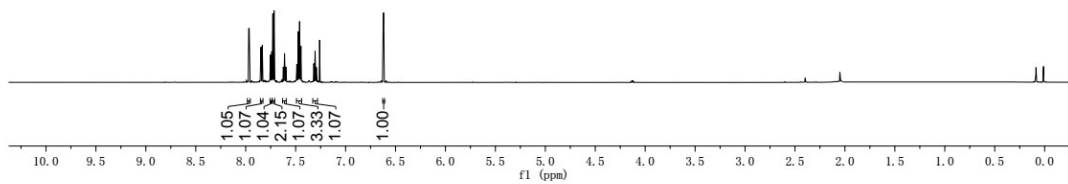

149.2692  
148.3204  
139.9069  
131.9119  
130.8666  
129.5463  
128.7425  
127.9642  
127.2487  
126.6556  
123.7734  
119.2037  
107.0656  
77.3242  
77.1118  
76.8991

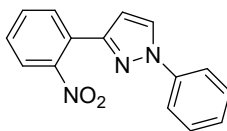

**31**

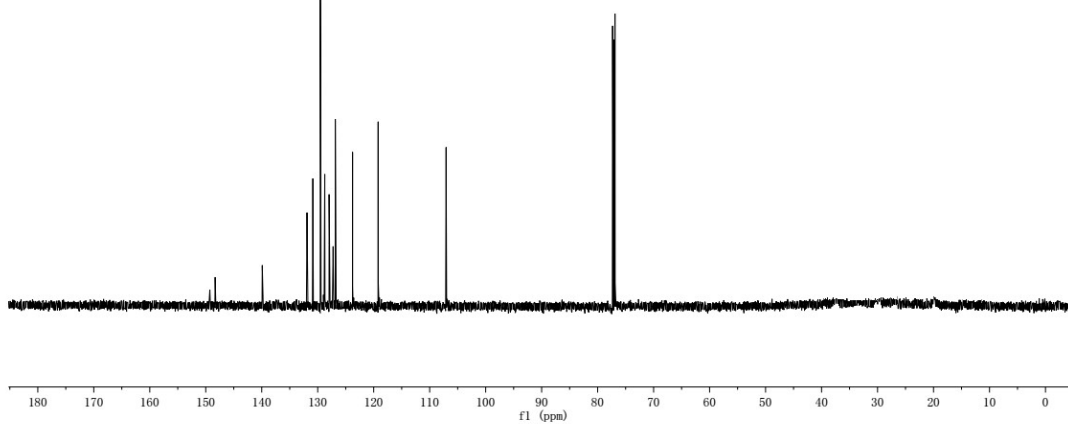

7.8837  
7.8894  
7.7069  
7.7050  
7.7016  
7.6956  
7.6941  
7.6924  
7.6907  
7.4679  
7.4648  
7.4614  
7.4556  
7.4524  
7.4506  
7.4474  
7.4412  
7.4381  
7.4347  
7.2864  
7.2780  
7.2733  
7.2176  
7.1585  
7.1310  
7.1245  
7.1232  
7.1118  
7.1106  
7.0783  
7.0746  
7.0716  
6.8366  
6.8353  
6.8324  
6.8310  
6.8230  
6.8216  
6.8187  
6.8174  
6.6855  
6.6813  
3.8376

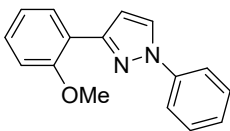

**3m**

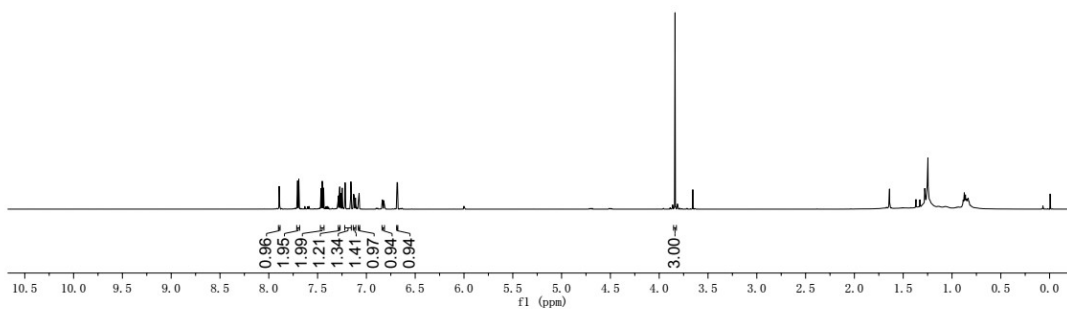

159.9540  
152.2522  
140.1088  
138.5641  
130.7968  
129.7571  
129.5563  
127.9850  
126.4565  
120.8718  
119.4374  
119.0338  
113.8427  
111.4575  
106.1135  
77.3397  
77.1282  
76.9168  
55.3252

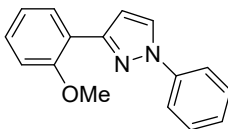

**3m**

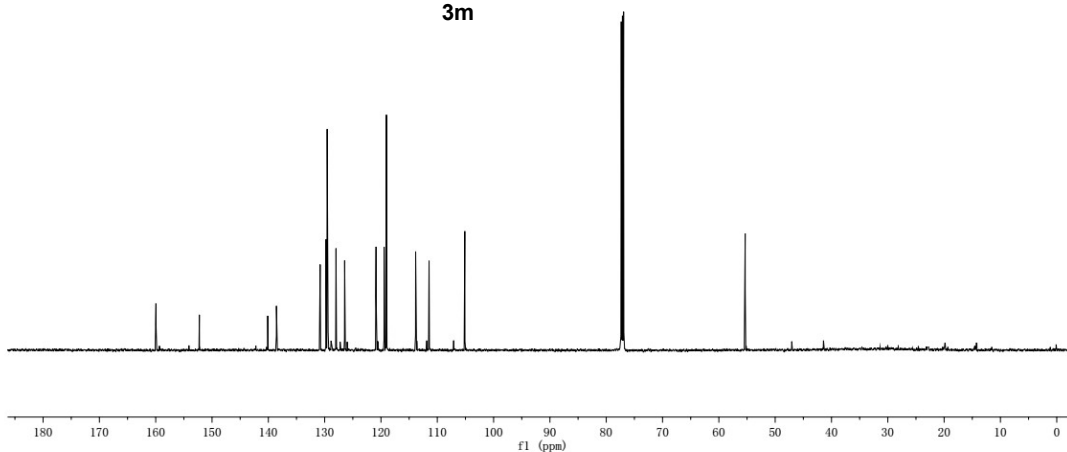

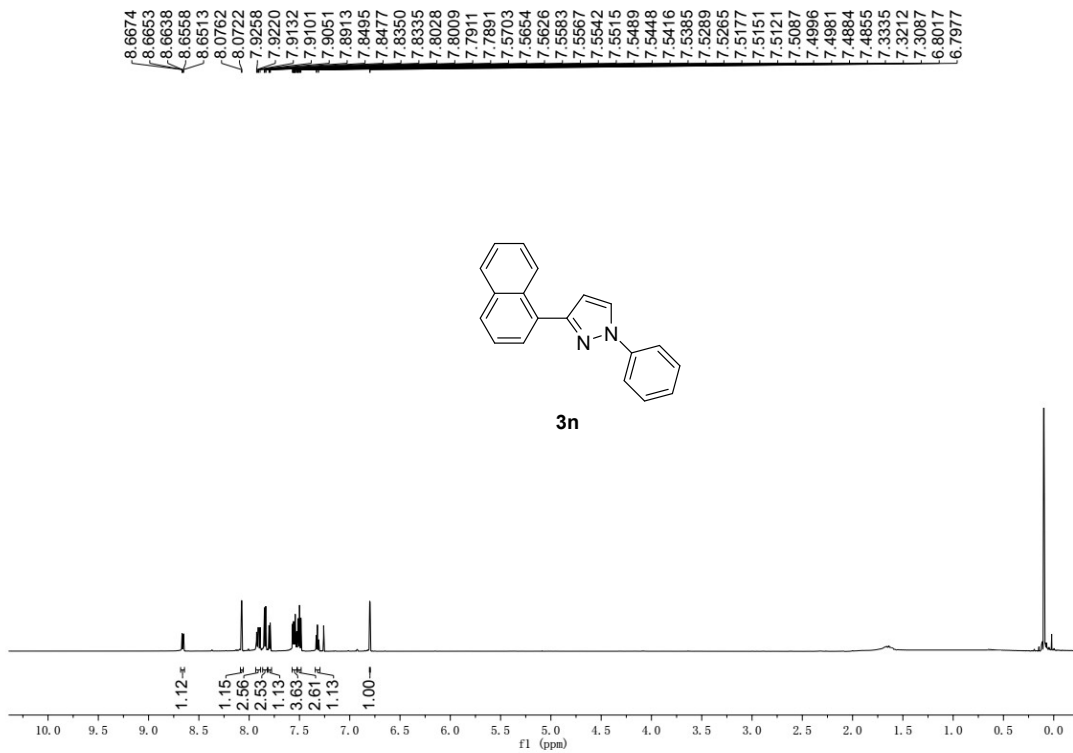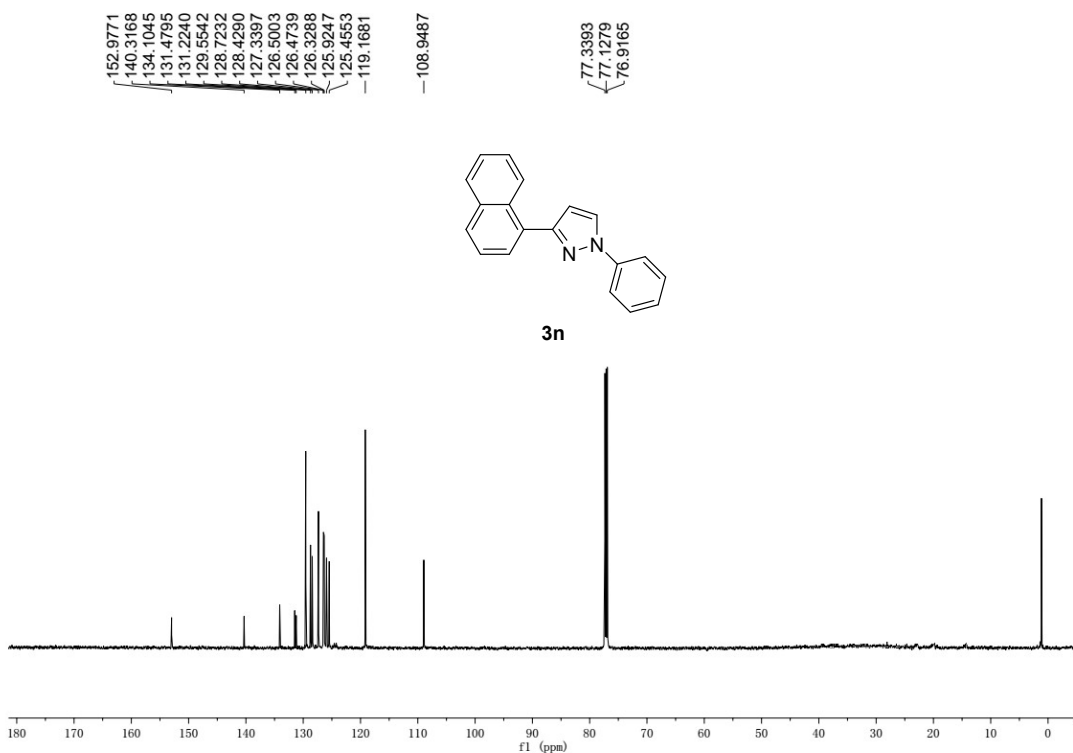

7.9225  
7.9185  
7.7517  
7.7375  
7.4754  
7.4628  
7.4487  
7.4228  
7.4209  
7.4169  
7.4153  
7.2953  
7.2934  
7.2807  
7.2865  
7.0847  
6.8689  
6.6771

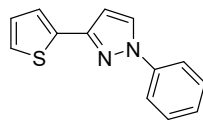

3o

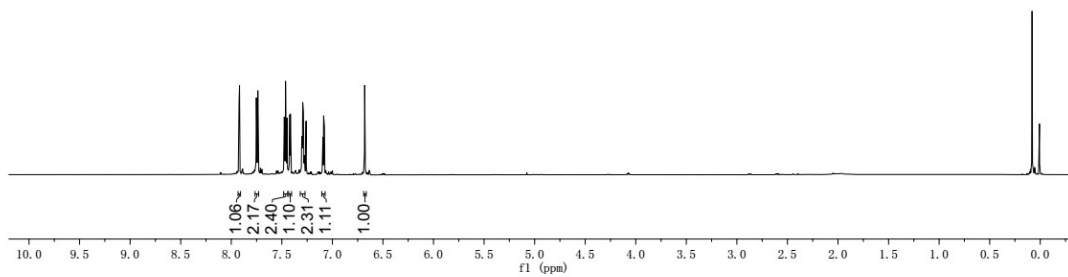

-148.3222  
-140.0456  
-136.4400  
-129.5094  
-128.0912  
-127.5538  
-126.5020  
-125.0206  
-124.2901  
-119.1652  
-105.1717  
77.3267  
77.1155  
76.9040

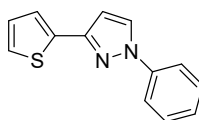

3o

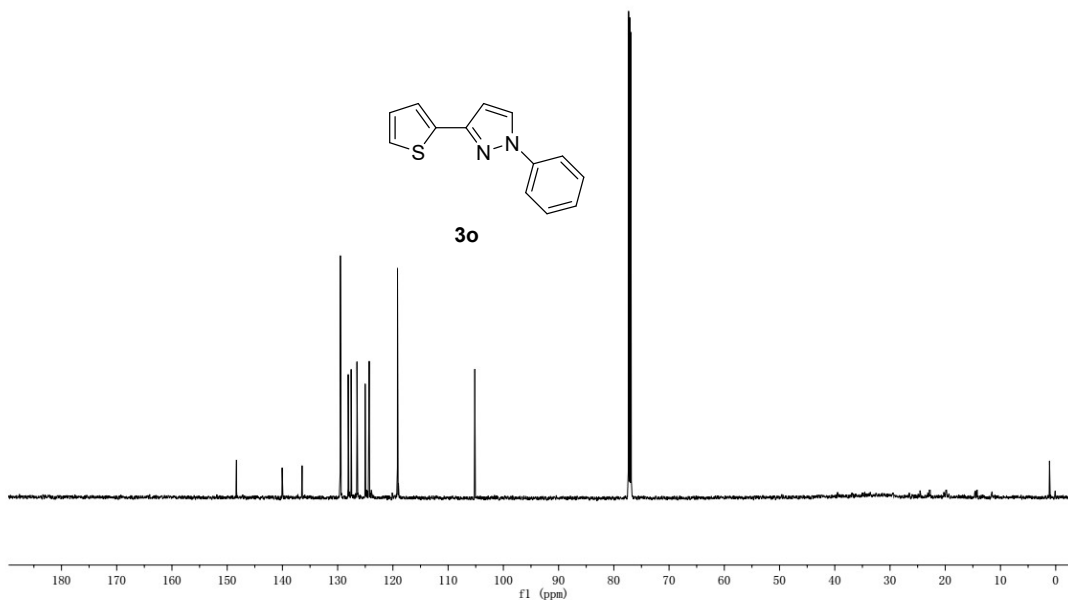

7.9265  
7.9223  
7.7506  
7.7487  
7.7474  
7.7378  
7.7344  
7.4995  
7.4981  
7.4966  
7.4952  
7.4736  
7.4722  
7.4626  
7.4611  
7.4594  
7.4469  
7.3081  
6.7888  
6.7836  
6.7793  
6.7780  
6.7054  
6.7012  
6.5035  
6.5006  
6.4879  
6.4950

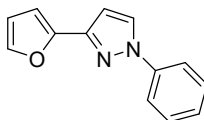

3p

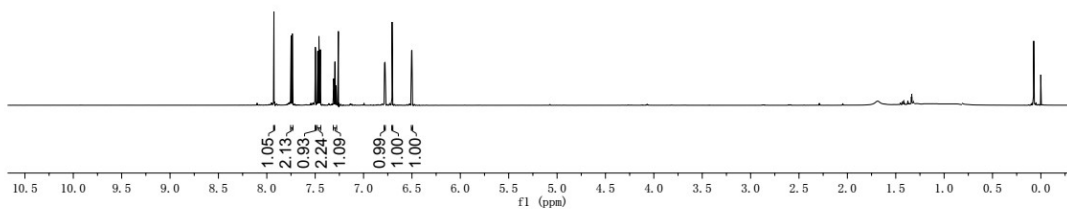

148.6081  
146.5172  
142.2321  
140.0382  
129.5053  
127.9585  
126.6355  
119.3501  
111.4804  
106.5558  
105.0456  
77.3186  
77.1074  
76.8961

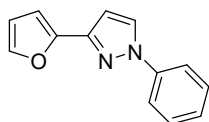

3p

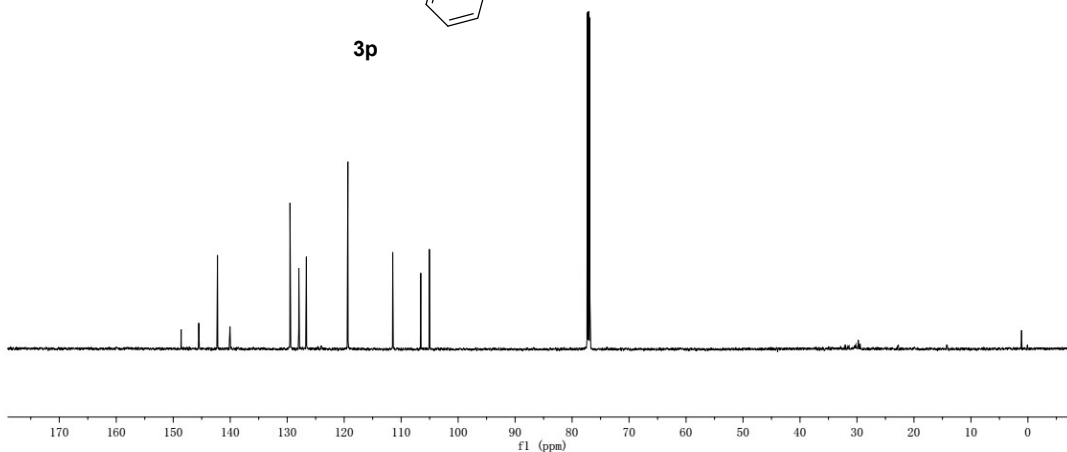

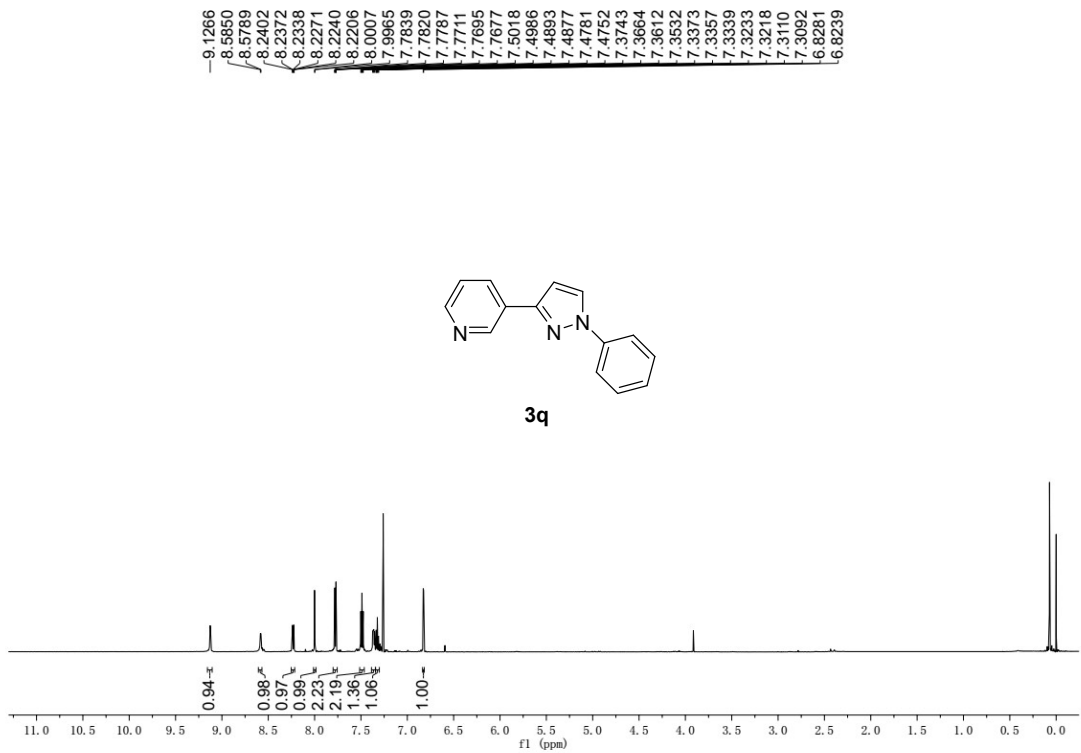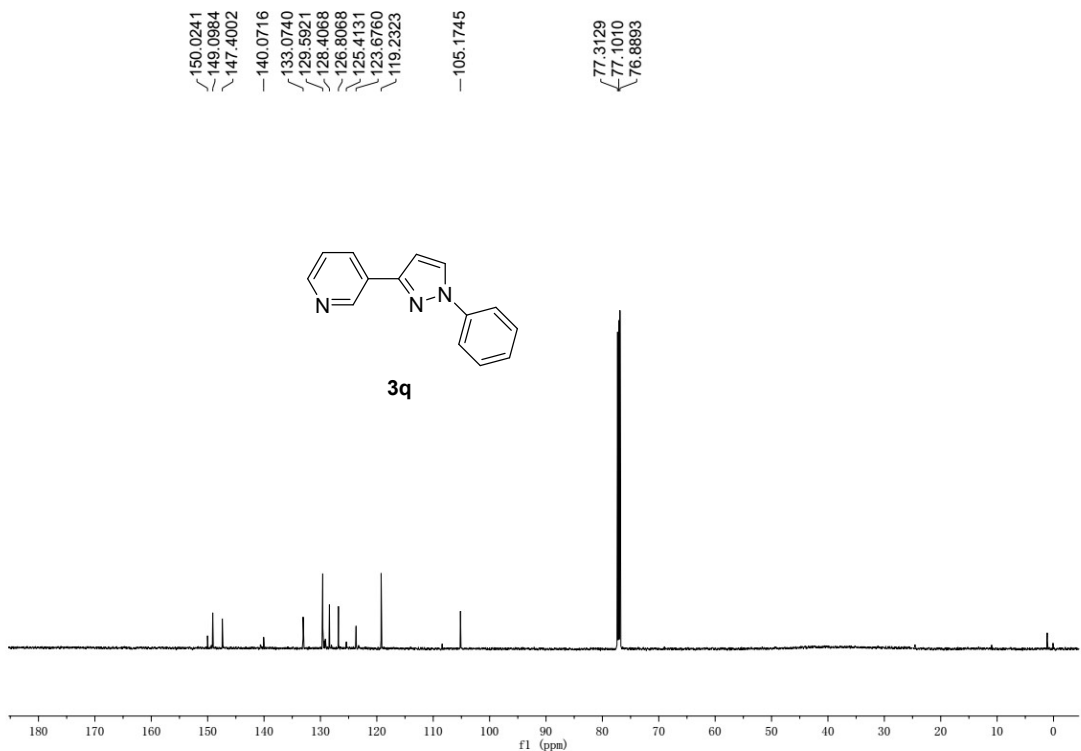



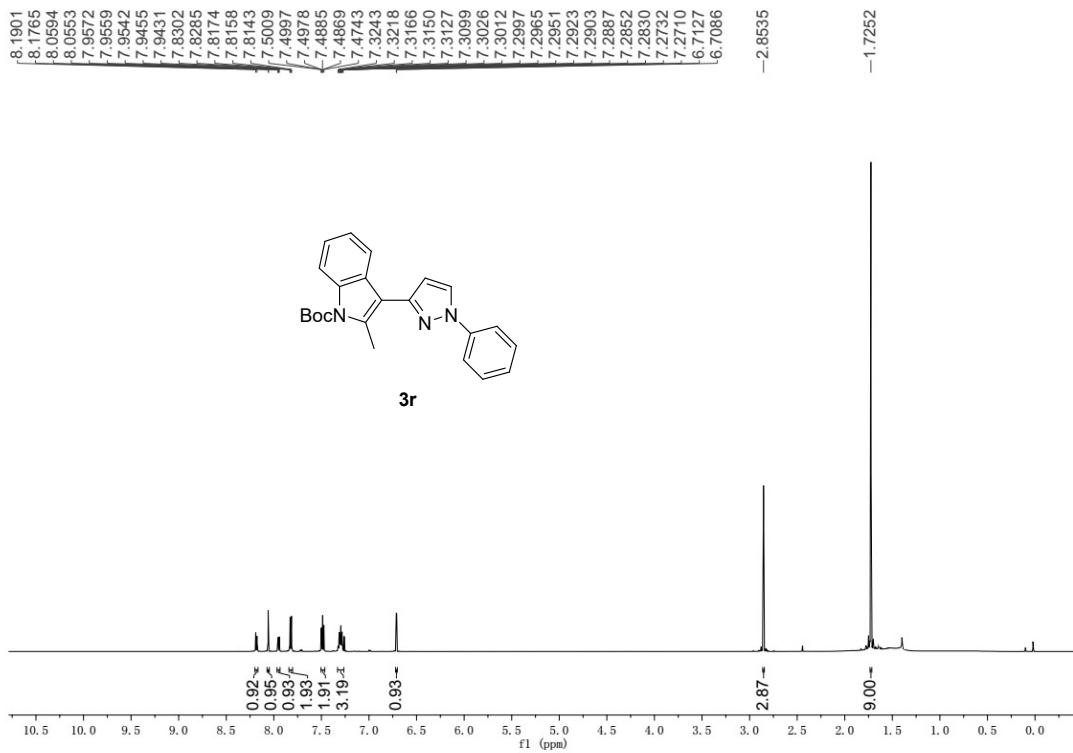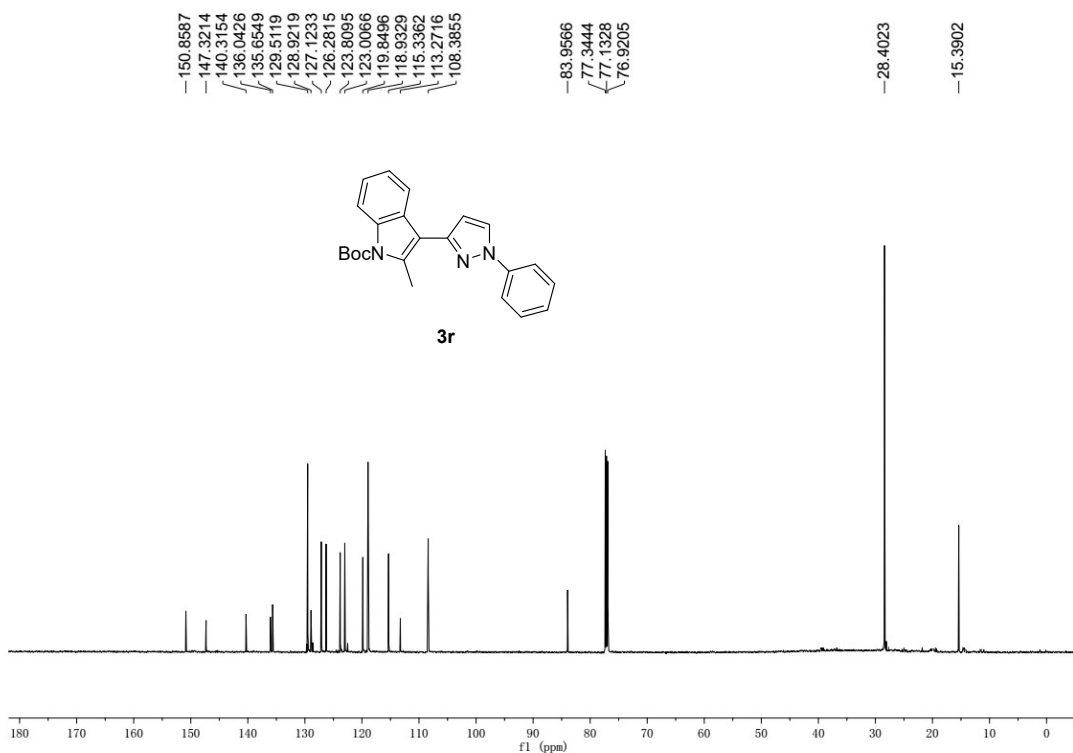

7.8340  
7.8330  
7.8298  
7.8288  
7.6773  
7.6757  
7.6738  
7.6726  
7.6704  
7.6644  
7.6629  
7.6612  
7.6595  
7.4448  
7.4434  
7.4413  
7.4324  
7.4306  
7.4212  
7.4195  
7.4181  
7.2675  
7.2657  
7.2639  
7.2550  
7.2533  
7.2519  
7.2510  
7.2427  
7.2410  
7.2391  
6.5242  
6.5217  
6.5191  
6.5151  
6.5109  
6.4975  
6.4949  
6.4924  
6.4127  
6.4022  
6.3917  
6.3860  
6.3755  
6.3650  
2.2753  
2.2734  
2.2708  
2.2629  
2.2607  
2.2584  
2.2505  
2.2479  
2.2461  
2.2381  
2.2355  
1.1260  
1.1136  
1.1012

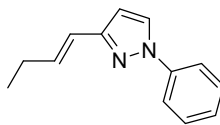

3s

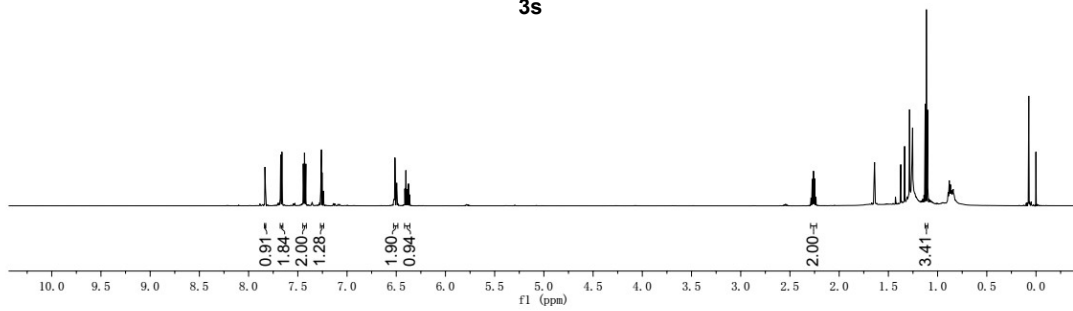

-152.7531  
140.2211  
135.3848  
129.4578  
127.6231  
126.1397  
120.9327  
118.9200  
-104.4277  
77.3191  
77.1079  
76.8966  
-25.9709  
-13.3821

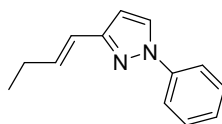

3s

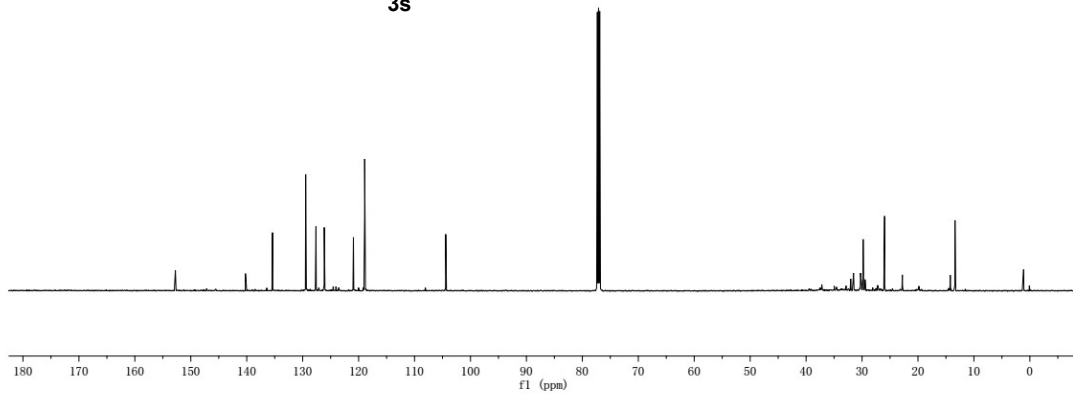

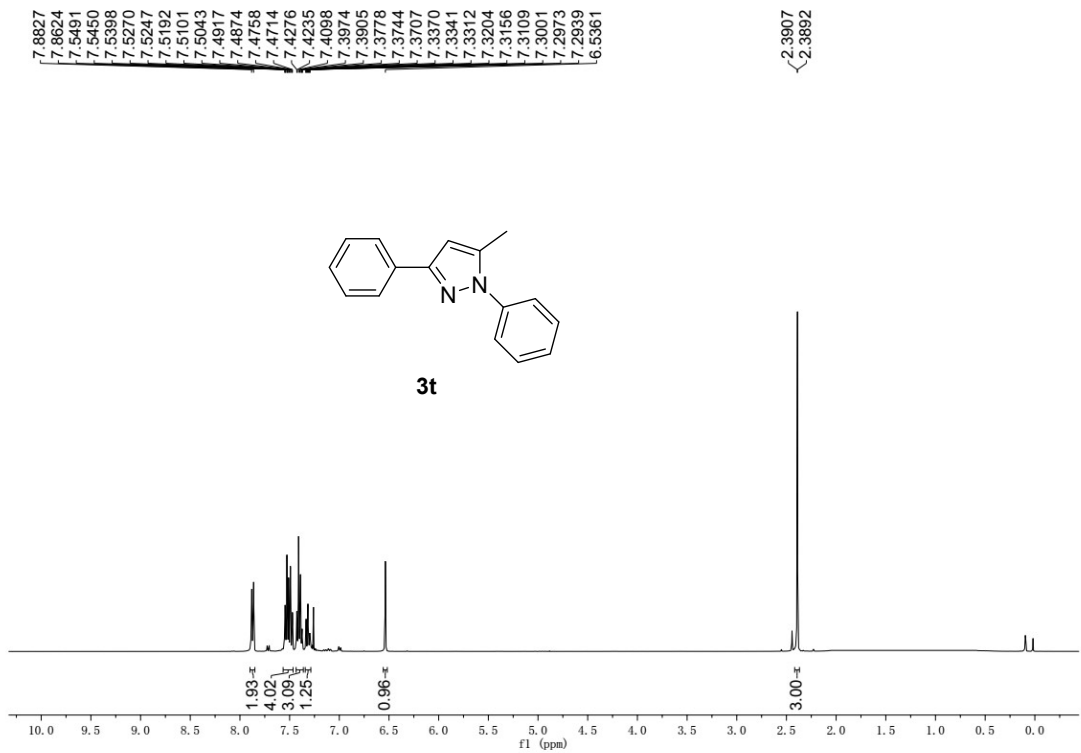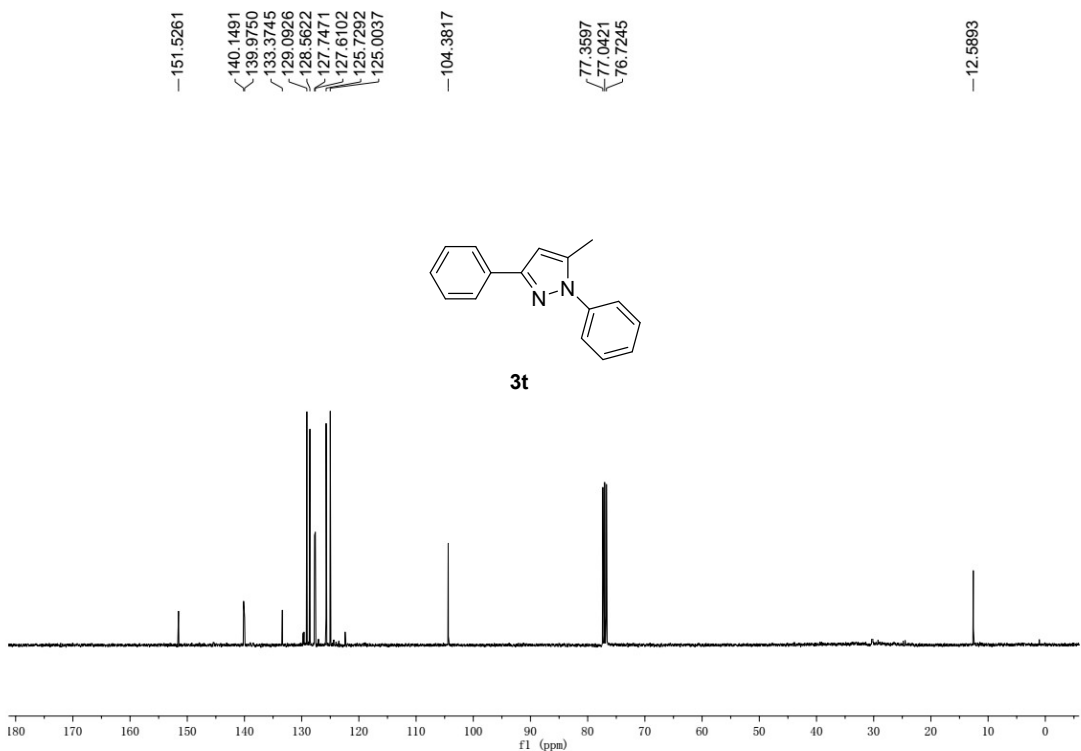

8.0762  
8.0258  
8.0216  
8.0126  
8.0084  
7.9990  
7.9951  
7.9723  
7.9689  
7.9586  
7.9551  
7.9412  
7.9381  
7.9274  
7.9261  
7.9251  
7.9144  
7.9122  
7.9086  
7.8955  
7.8822  
7.8493  
7.8363  
7.809  
7.7675  
7.7641  
7.7499  
7.7440  
7.7417  
7.7287  
7.73843  
7.73824  
7.73804  
7.73699  
7.73633  
7.73599  
7.73577  
7.73558  
7.73498  
6.8293  
6.8251

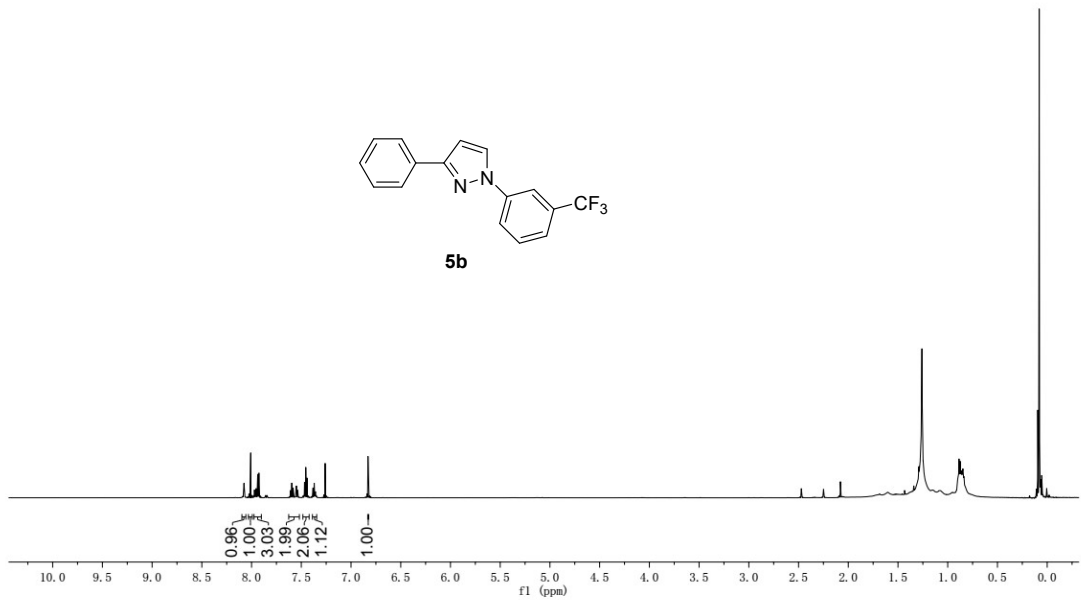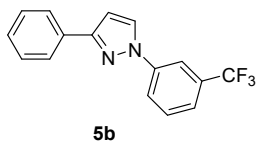

153.6629  
140.5670  
132.7428  
132.2007  
131.9862  
130.1343  
129.9097  
129.8810  
128.8092  
128.4448  
128.0261  
125.9940  
122.8159  
122.7958  
121.7923  
115.8807  
115.8558  
115.8344  
115.8102  
105.8862  
77.3082  
77.0970  
76.8857

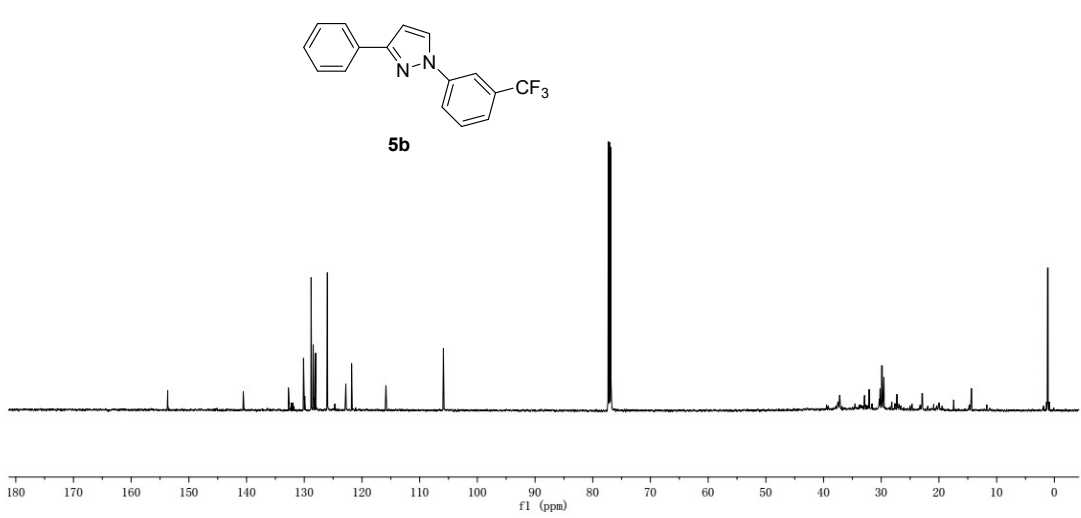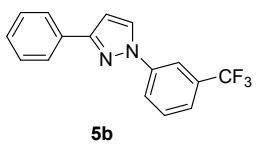

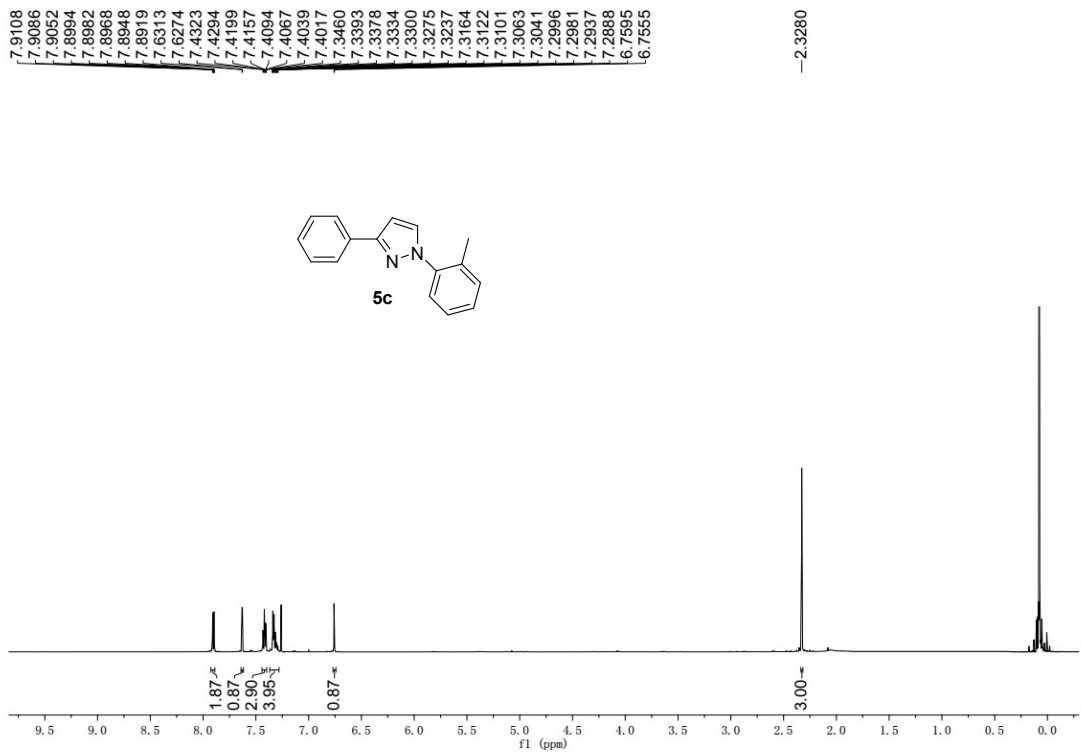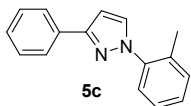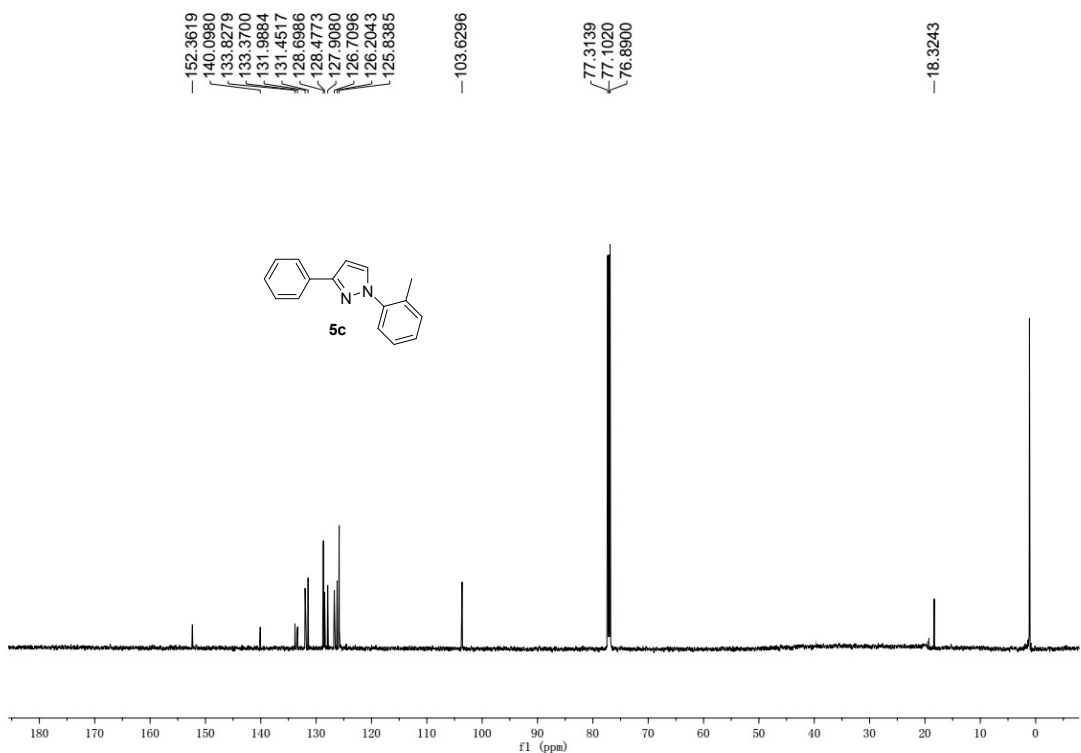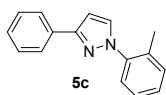

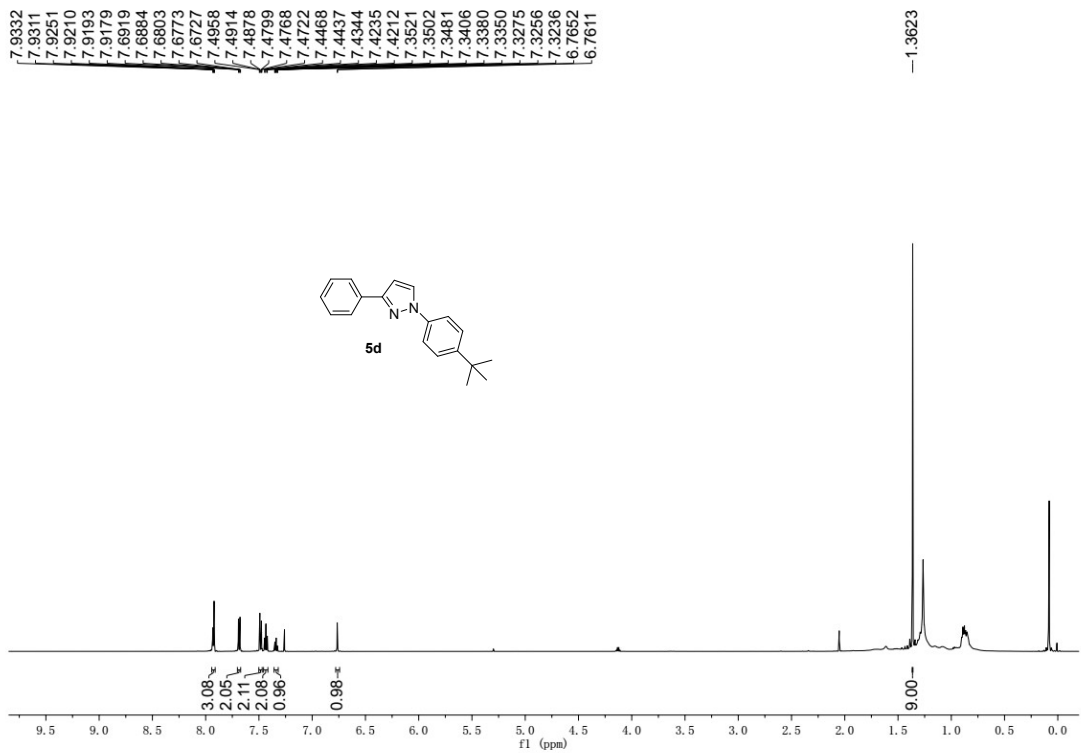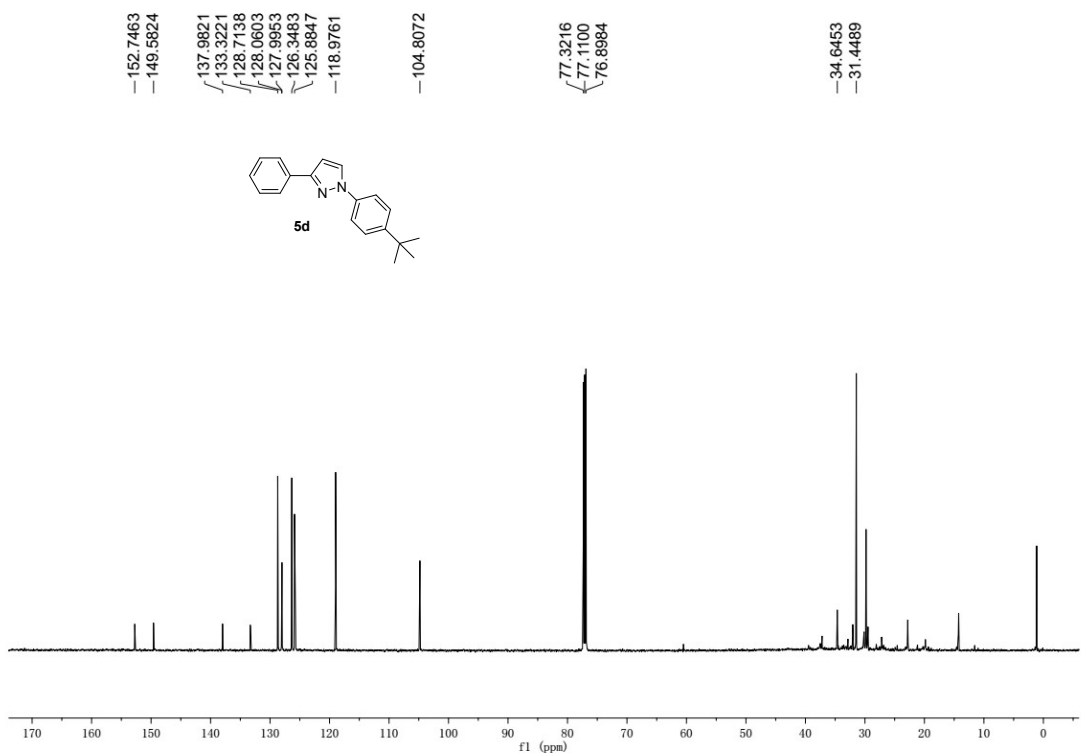

7.912  
7.902  
7.9075  
7.9041  
7.8984  
7.8972  
7.8969  
7.8957  
7.8944  
7.8854  
7.7048  
7.7004  
7.6993  
7.6888  
7.6860  
7.6855  
7.6745  
7.6700  
7.4724  
7.4696  
7.4679  
7.4662  
7.4652  
7.4635  
7.4618  
7.4591  
7.4575  
7.4565  
7.4536  
7.4528  
7.4503  
7.4485  
7.4468  
7.4441  
7.4339  
7.4312  
7.4292  
7.3764  
7.3743  
7.3721  
7.3649  
7.3620  
7.3598  
7.3568  
7.3496  
7.3475  
7.2776  
7.2629  
7.2617  
7.2495  
7.2482  
7.2325  
6.7923  
6.7881

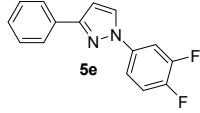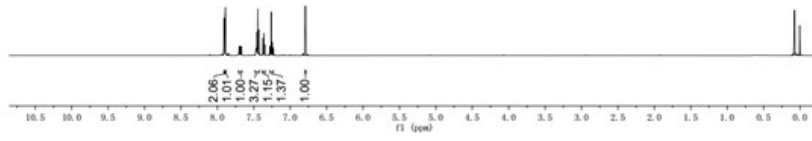

153.4639  
151.5475  
149.8897  
149.8865  
149.8228  
148.5379  
147.9785  
147.8954  
136.8419  
136.8022  
136.7872  
136.7832  
128.8082  
128.4040  
128.0902  
125.9273  
117.9696  
117.8463  
114.3925  
114.3698  
114.3520  
114.3229  
108.9323  
106.7060  
77.3189  
77.1077  
76.8964

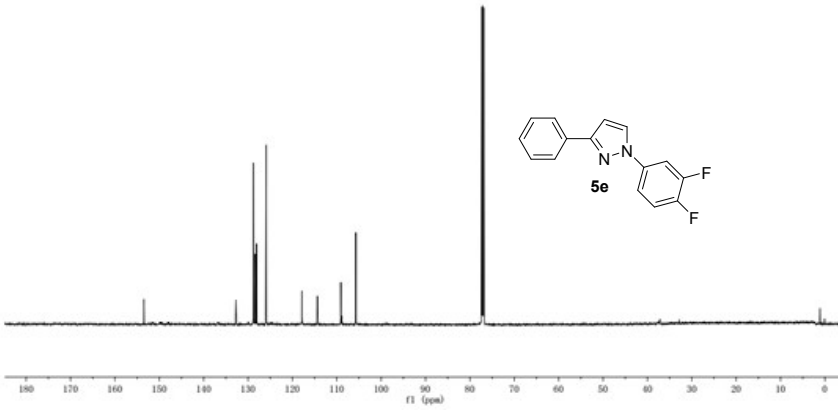

7.9095  
7.9073  
7.9040  
7.8982  
7.8970  
7.8956  
7.8936  
7.8297  
7.8254  
7.4521  
7.4449  
7.4437  
7.4412  
7.4324  
7.4251  
7.4224  
7.4195  
7.4172  
7.3956  
7.3901  
7.3870  
7.3816  
7.3563  
7.3542  
7.3521  
7.3448  
7.3419  
7.3390  
7.3316  
7.3296  
6.7283  
6.7242

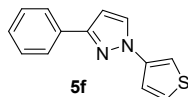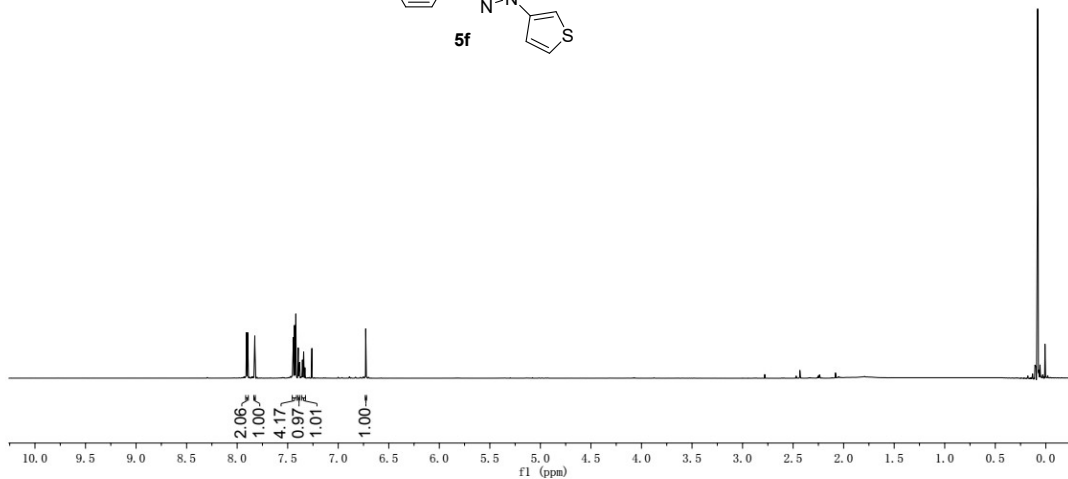

152.6218  
139.9729  
133.0594  
128.8540  
128.7411  
128.1178  
126.5118  
125.9183  
120.4020  
110.6760  
104.5377  
77.3209  
77.1094  
76.8979

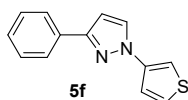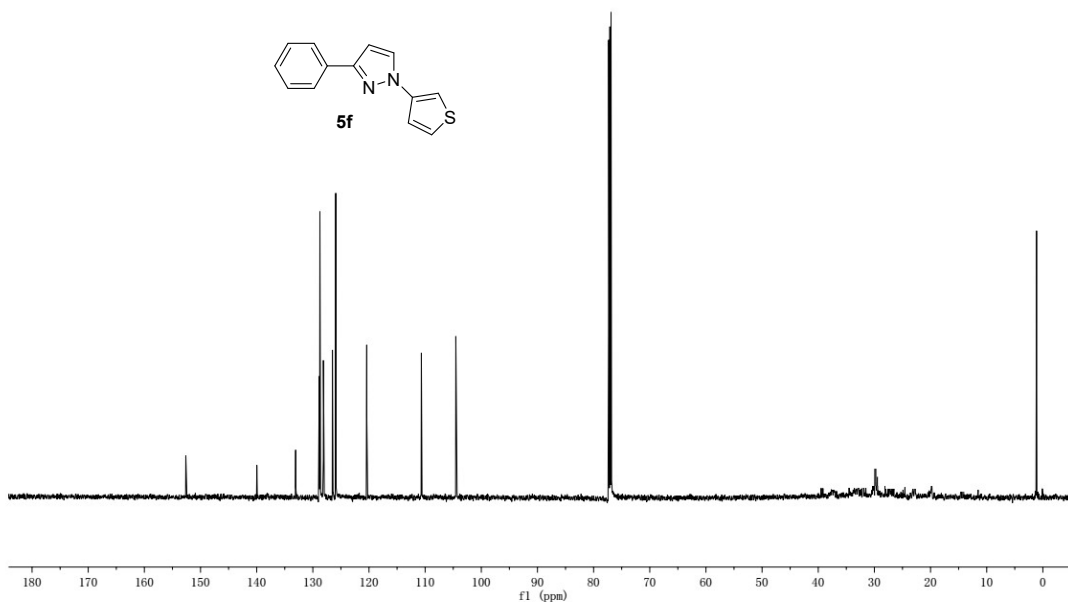



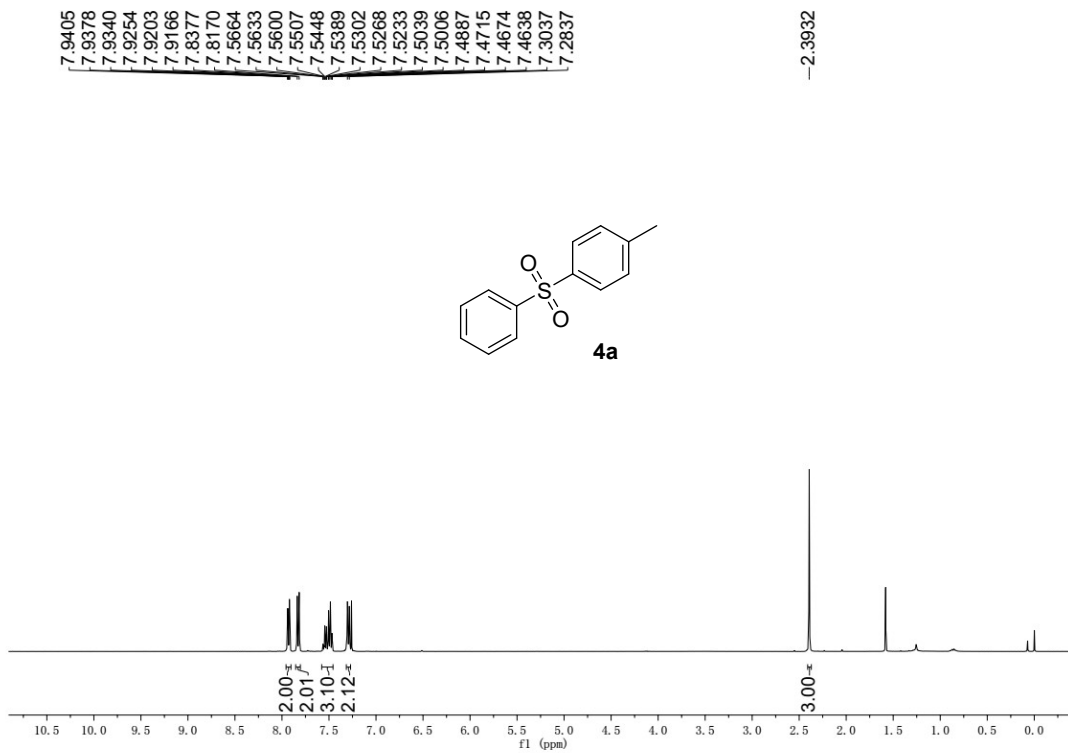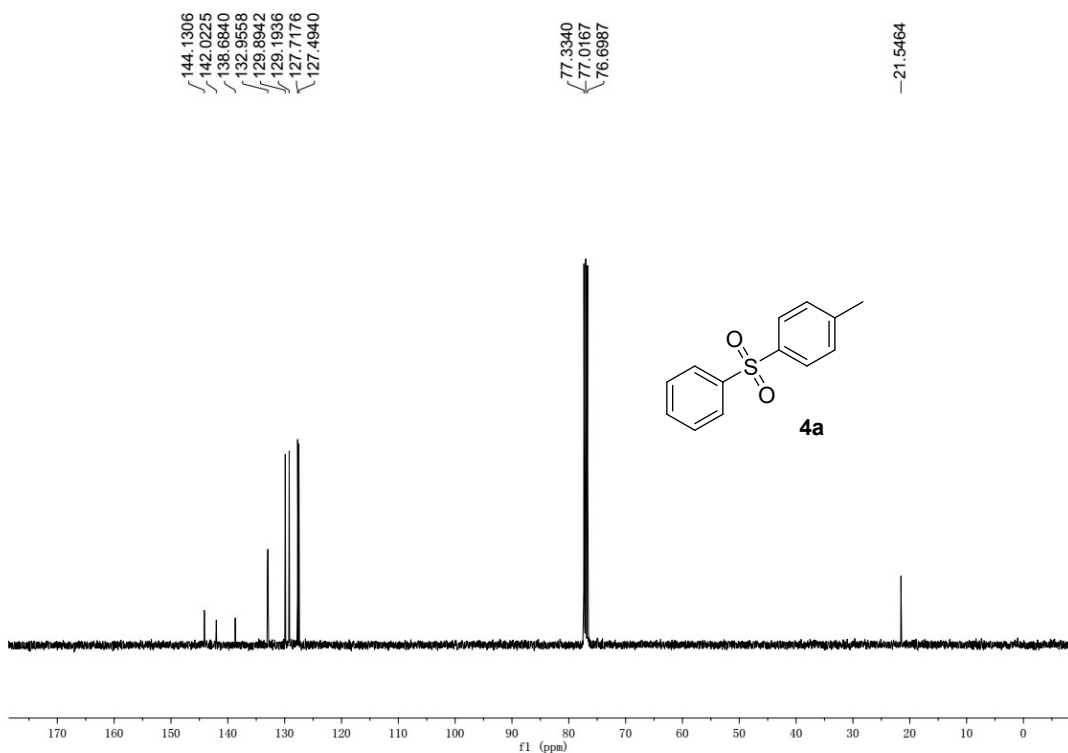

7.6856  
7.6717  
7.2711  
6.9397

2.5995  
2.4045  
2.2986

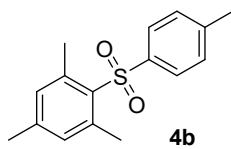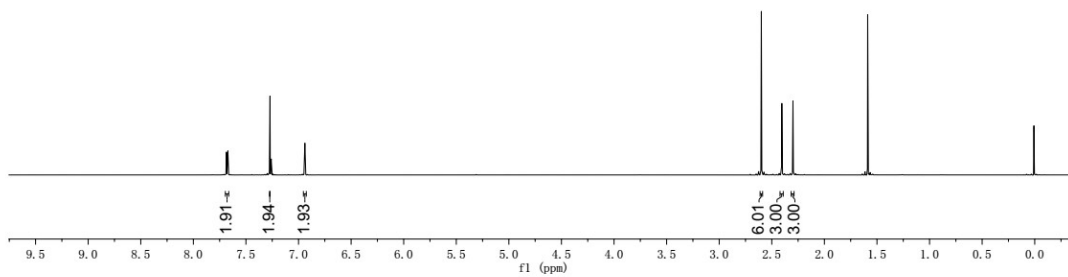

143.4562  
143.2864  
140.6940  
140.0317  
134.2174  
132.2461  
129.5480  
126.3861

77.3418  
77.1298  
76.9179

22.9241  
21.6271  
21.0963

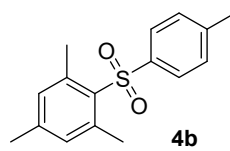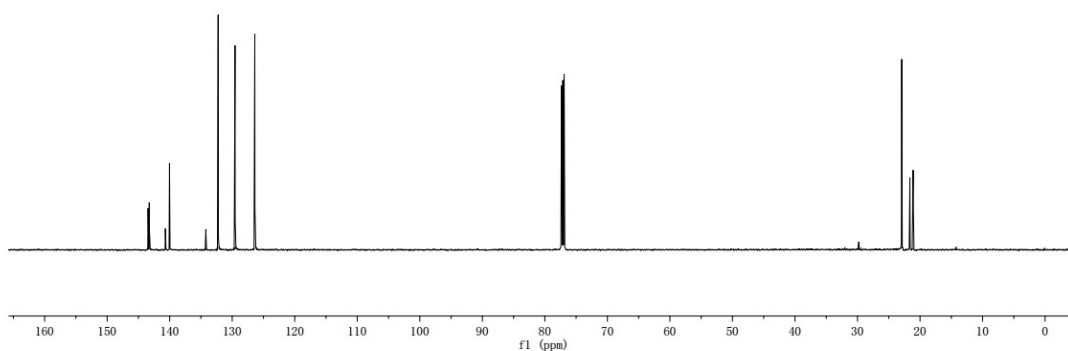

## 9. X-Ray Structure of 3i

Compound **3i** (CCDC 1899449) contains the supplementary crystallographic data for this paper. These data can be obtained free of charge from The Cambridge Crystallographic Data Centre via [www.ccdc.cam.ac.uk/data\\_request/cif](http://www.ccdc.cam.ac.uk/data_request/cif).

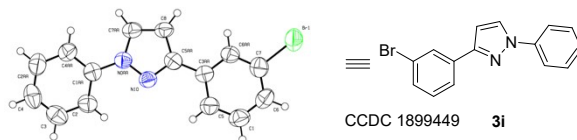

**Table S1.** Crystal data and structure refinement for Compound **3i**

| Identification code                         | <b>3i</b>                                                     |
|---------------------------------------------|---------------------------------------------------------------|
| Empirical formula                           | C <sub>15</sub> H <sub>11</sub> BrN <sub>2</sub>              |
| Formula weight                              | 299.17                                                        |
| Temperature/K                               | 292.95(10)                                                    |
| Crystal system                              | orthorhombic                                                  |
| Space group                                 | P2 <sub>1</sub> 2 <sub>1</sub> 2 <sub>1</sub>                 |
| a/Å                                         | 5.5406(3)                                                     |
| b/Å                                         | 8.3315(5)                                                     |
| c/Å                                         | 27.8631(12)                                                   |
| α/°                                         | 90                                                            |
| β/°                                         | 90                                                            |
| γ/°                                         | 90                                                            |
| Volume/Å <sup>3</sup>                       | 1286.21(12)                                                   |
| Z                                           | 4                                                             |
| ρ <sub>calc</sub> /cm <sup>3</sup>          | 1.545                                                         |
| μ/mm <sup>-1</sup>                          | 4.199                                                         |
| F(000)                                      | 600.0                                                         |
| Crystal size/mm <sup>3</sup>                | 0.7 × 0.6 × 0.1                                               |
| Radiation                                   | CuKα (λ = 1.54184)                                            |
| 2θ range for data collection/°              | 11.084 to 145.704                                             |
| Index ranges                                | -4 ≤ h ≤ 6, -9 ≤ k ≤ 10, -34 ≤ l ≤ 34                         |
| Reflections collected                       | 7593                                                          |
| Independent reflections                     | 2447 [R <sub>int</sub> = 0.0656, R <sub>sigma</sub> = 0.0467] |
| Data/restraints/parameters                  | 2447/0/163                                                    |
| Goodness-of-fit on F <sup>2</sup>           | 1.083                                                         |
| Final R indexes [I > 2σ (I)]                | R <sub>1</sub> = 0.0804, wR <sub>2</sub> = 0.2372             |
| Final R indexes [all data]                  | R <sub>1</sub> = 0.0917, wR <sub>2</sub> = 0.2596             |
| Largest diff. peak/hole / e Å <sup>-3</sup> | 1.18/-1.18                                                    |
| Flack parameter                             | -0.01(4)                                                      |

## 10. X-Ray Structure of 4b

Compound **4b** (CCDC 1910849) contains the supplementary crystallo-graphic data for this paper. These data can be obtained free of charge from The Cambridge Crystallographic Data Centre via [www.ccdc.cam.ac.uk/data request/cif](http://www.ccdc.cam.ac.uk/data request/cif).

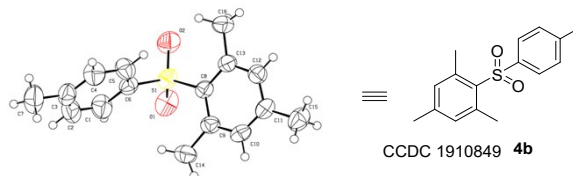

**Table S2.** Crystal data and structure refinement for Compound **4b**

| Identification code                         | <b>4b</b>                                                     |
|---------------------------------------------|---------------------------------------------------------------|
| Empirical formula                           | C <sub>16</sub> H <sub>18</sub> O <sub>2</sub> S              |
| Formula weight                              | 274.36                                                        |
| Temperature/K                               | 295.13(10)                                                    |
| Crystal system                              | monoclinic                                                    |
| Space group                                 | P2 <sub>1</sub> /c                                            |
| a/Å                                         | 8.1266(3)                                                     |
| b/Å                                         | 24.3656(8)                                                    |
| c/Å                                         | 7.7718(2)                                                     |
| α/°                                         | 90                                                            |
| β/°                                         | 110.298(4)                                                    |
| γ/°                                         | 90                                                            |
| Volume/Å <sup>3</sup>                       | 1443.33(9)                                                    |
| Z                                           | 4                                                             |
| ρ <sub>calc</sub> /g/cm <sup>3</sup>        | 1.263                                                         |
| μ/mm <sup>-1</sup>                          | 1.948                                                         |
| F(000)                                      | 584.0                                                         |
| Crystal size/mm <sup>3</sup>                | 0.7 × 0.3 × 0.1                                               |
| Radiation                                   | CuKα (λ = 1.54184)                                            |
| 2θ range for data collection/°              | 7.256 to 145.726                                              |
| Index ranges                                | -9 ≤ h ≤ 9, -29 ≤ k ≤ 29, -6 ≤ l ≤ 9                          |
| Reflections collected                       | 8456                                                          |
| Independent reflections                     | 2802 [R <sub>int</sub> = 0.0314, R <sub>sigma</sub> = 0.0274] |
| Data/restraints/parameters                  | 2802/0/176                                                    |
| Goodness-of-fit on F <sup>2</sup>           | 1.048                                                         |
| Final R indexes [I >= 2σ (I)]               | R <sub>1</sub> = 0.0556, wR <sub>2</sub> = 0.1556             |
| Final R indexes [all data]                  | R <sub>1</sub> = 0.0645, wR <sub>2</sub> = 0.1680             |
| Largest diff. peak/hole / e Å <sup>-3</sup> | 0.39/-0.32                                                    |
